# Supplementary material for: Global, Regional, and National Trends of Chagas Disease from 1990 to 2019: Comprehensive Analysis of the Global Burden of Disease Study
Source: PubMed Central journal article supplement (PMC9414802; doi:10.5334/gh.1150), 2022-08-24

**Global, Regional, and National Trends of Chagas Disease from 1990 to 2019: Comprehensive Analysis of the Global Burden of Disease Study**

**Supplementary File**

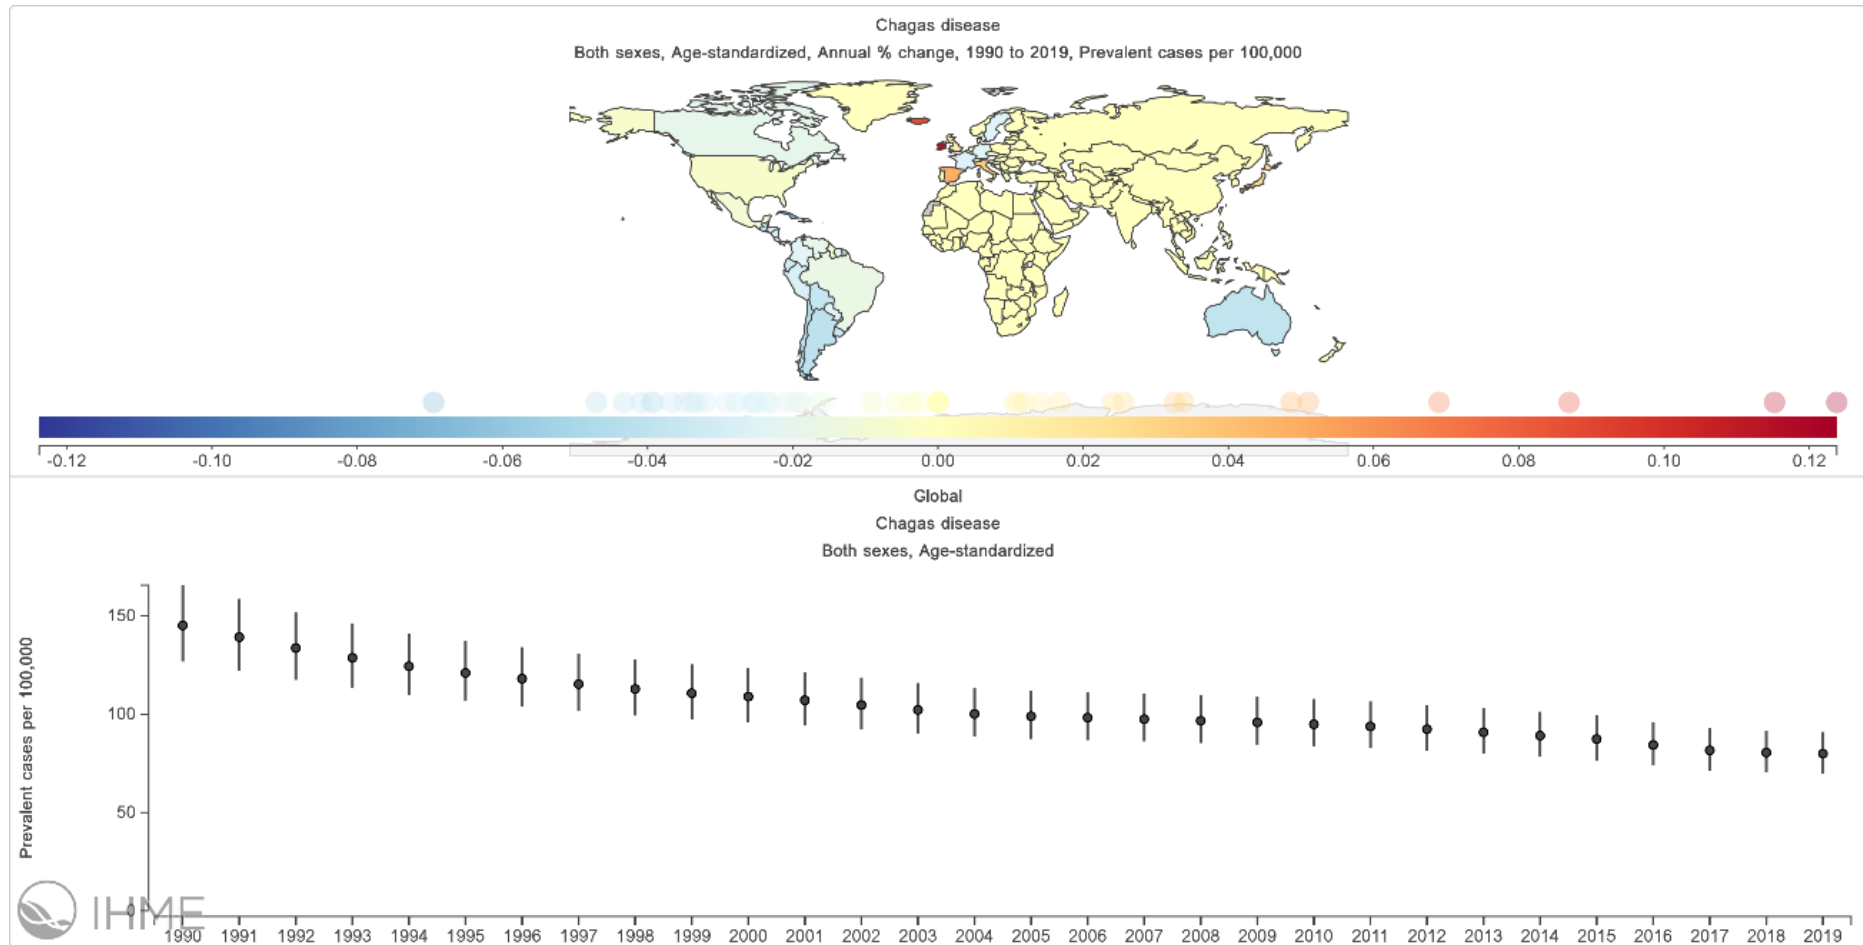

**Supplementary Figure 1.** Global Chagas Disease (CD) age-standardized prevalence rate trends from 1990 to 2019. **Top:** Annual % change in the age-standardized prevalence rate per country. **Bottom:** Mean estimates and uncertainty intervals of the global age-standardized prevalence rate per year.

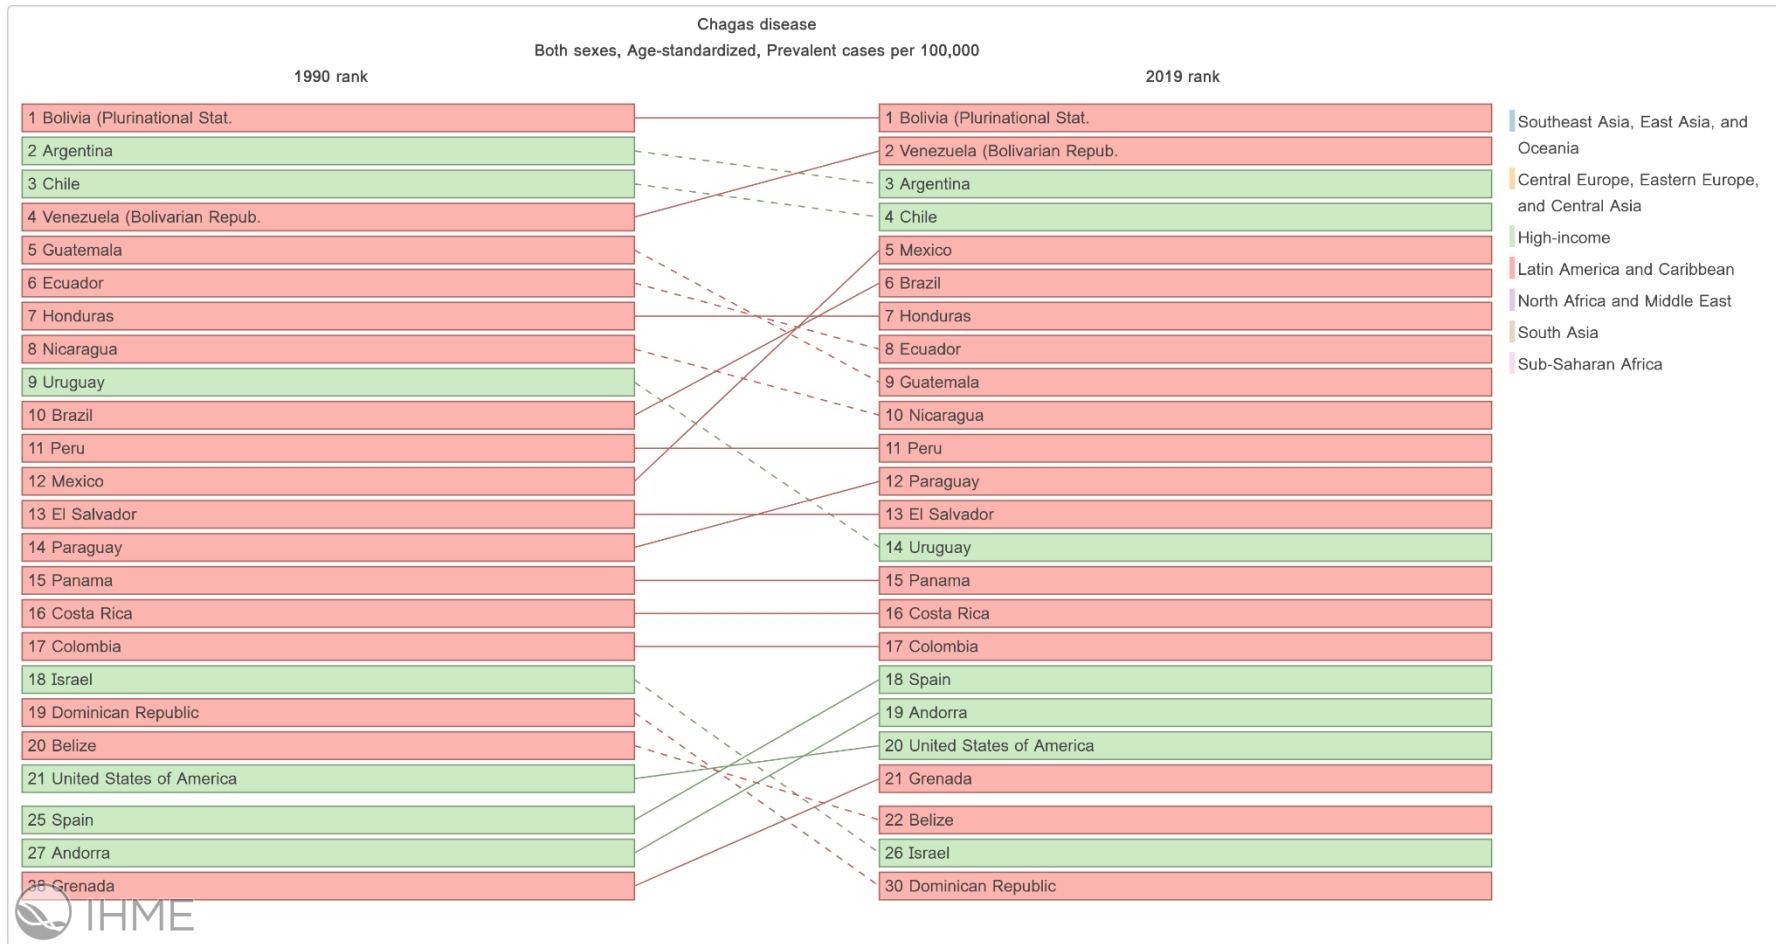

**Supplementary Figure 2.** Ranking of countries by Chagas Disease prevalence rate per 100,000 population in 1990 and 2019.

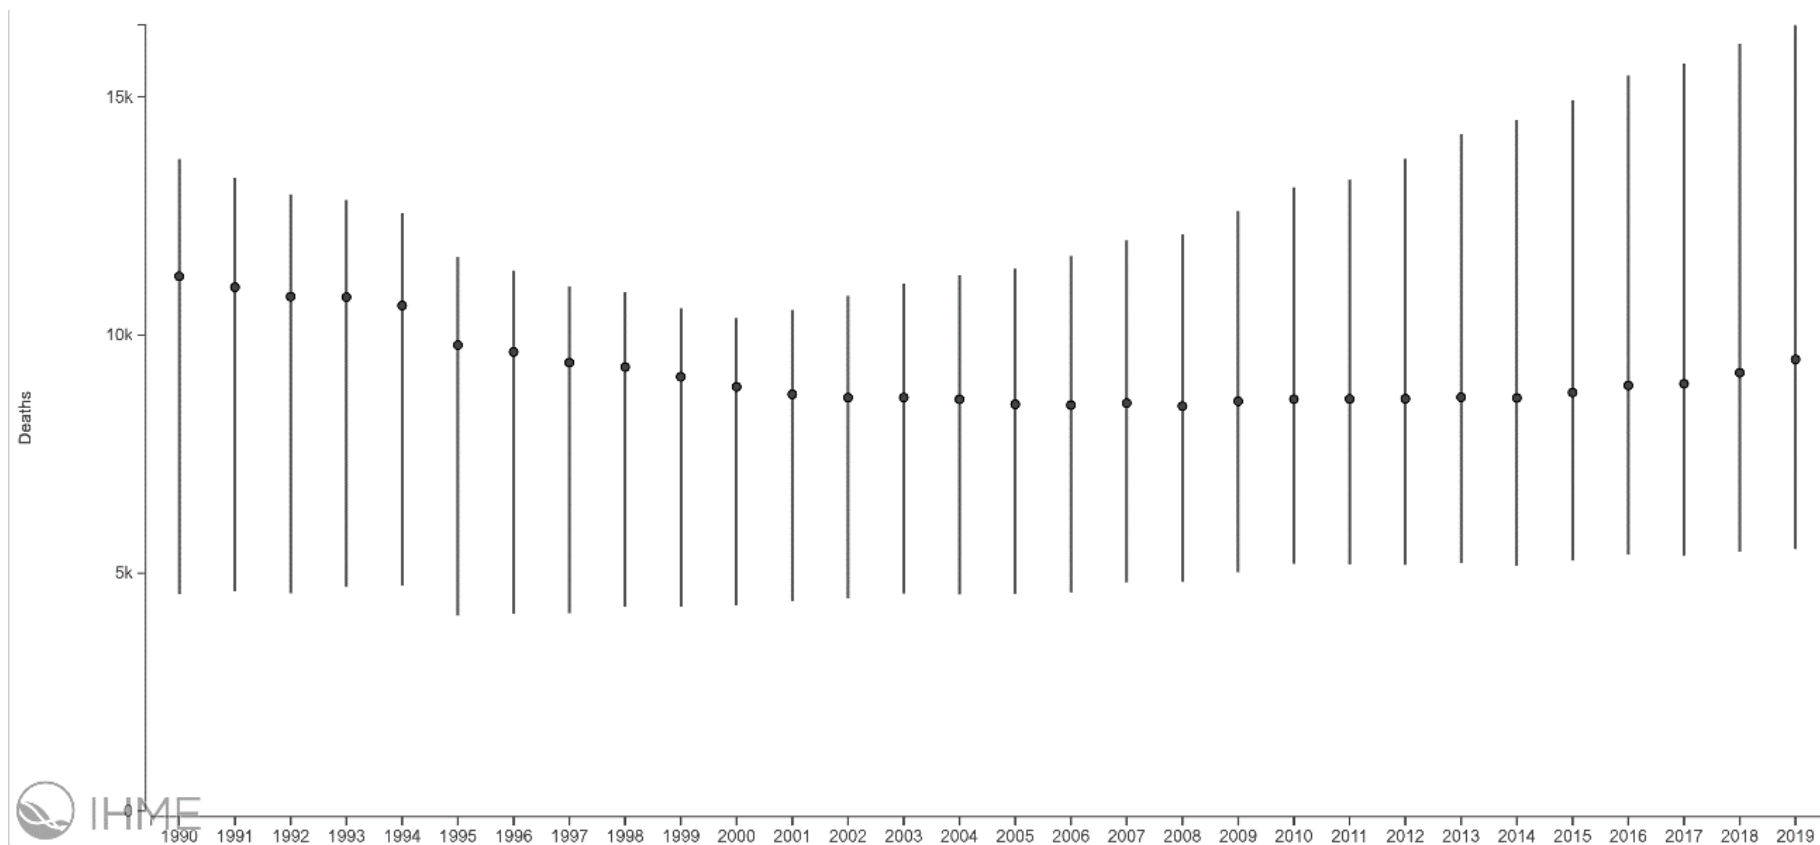

**Supplementary Figure 3.** Global Chagas Disease (CD) absolute number of attributed deaths from 1990 to 2019.

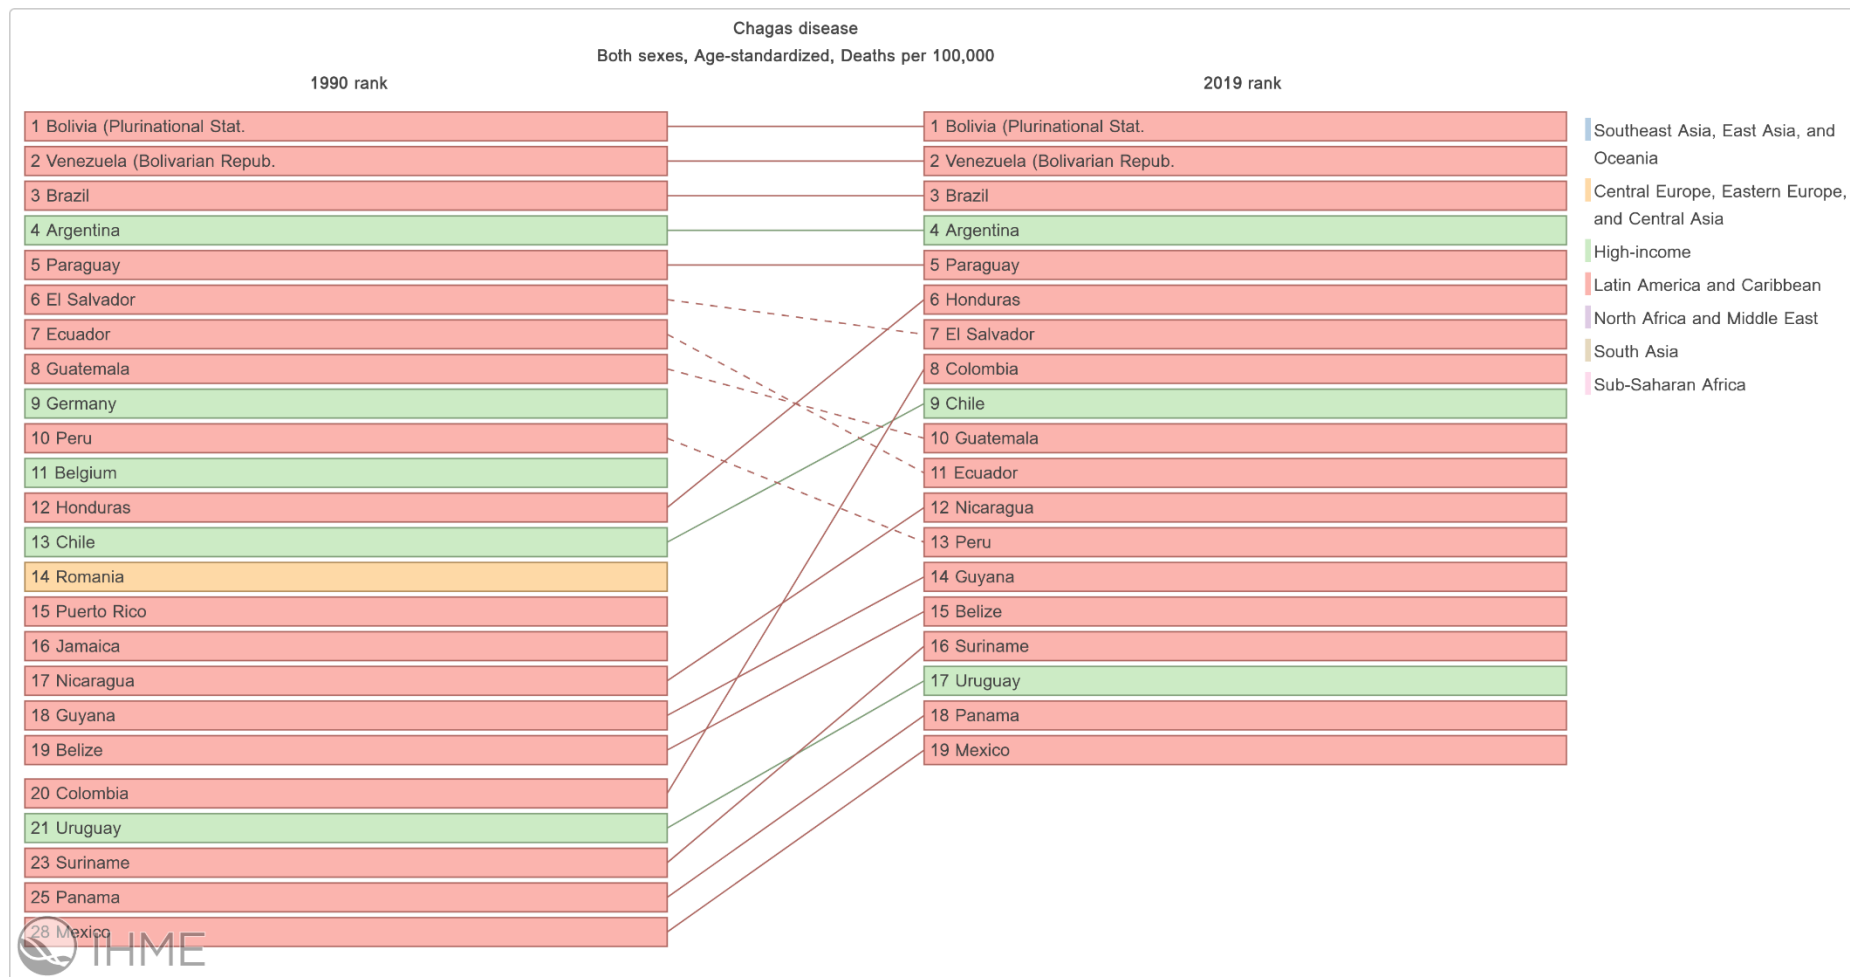

**Supplementary Figure 4.** Ranking of countries by Chagas Disease death rate per 100,000 population in 1990 and 2019.

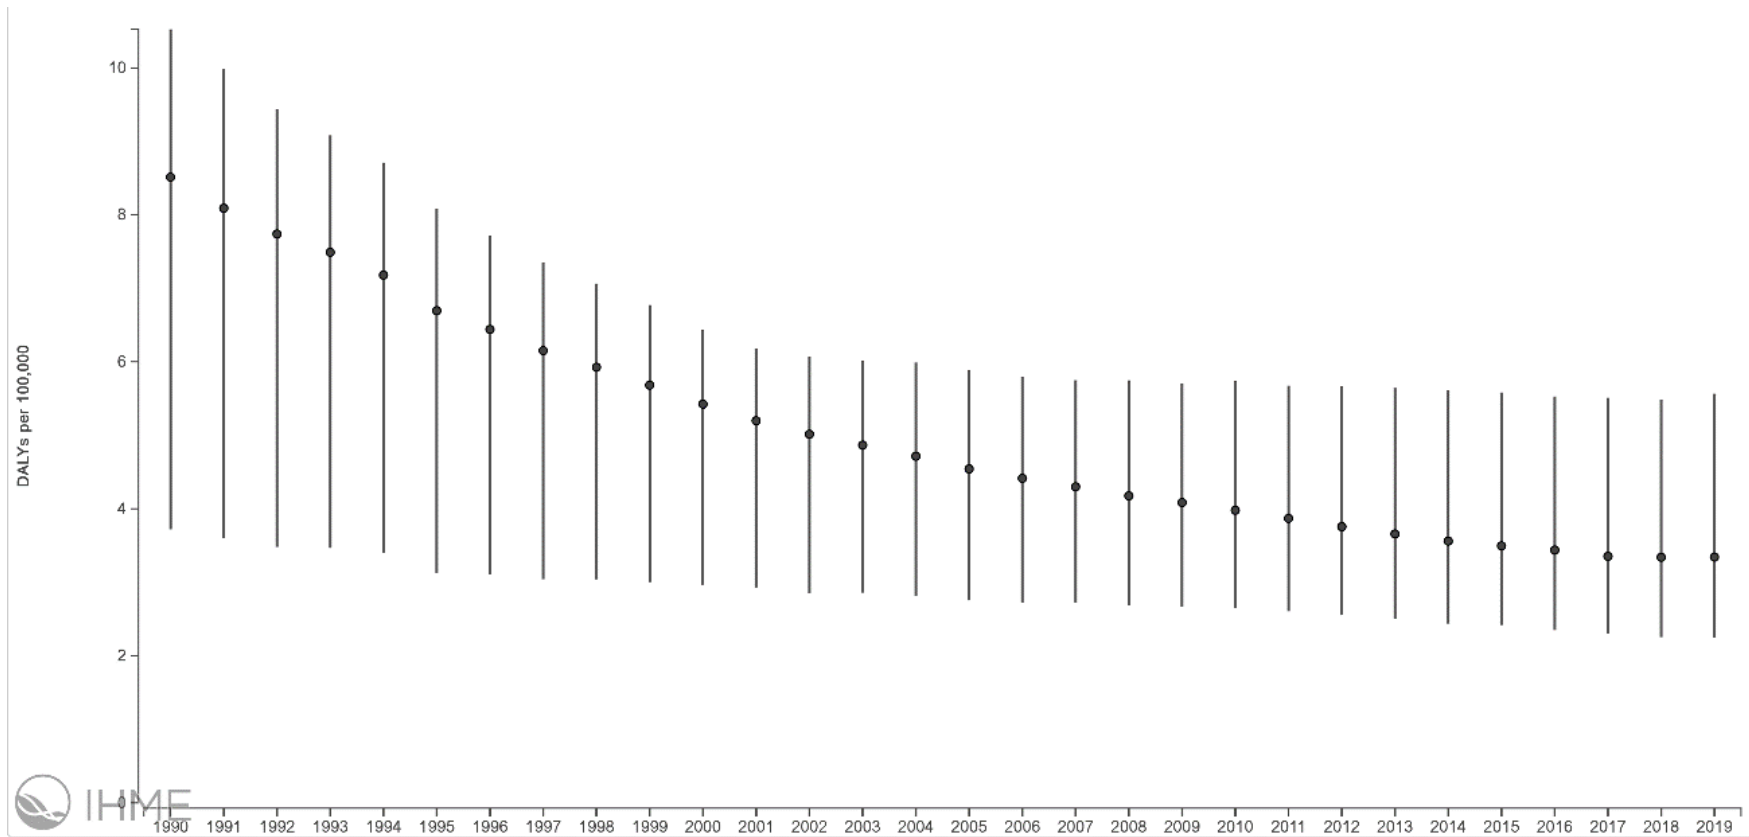

**Supplementary Figure 5.** Global Chagas Disease (CD) disability-adjusted life-years (DALYs) age-standardized rate from 1990 to 2019.

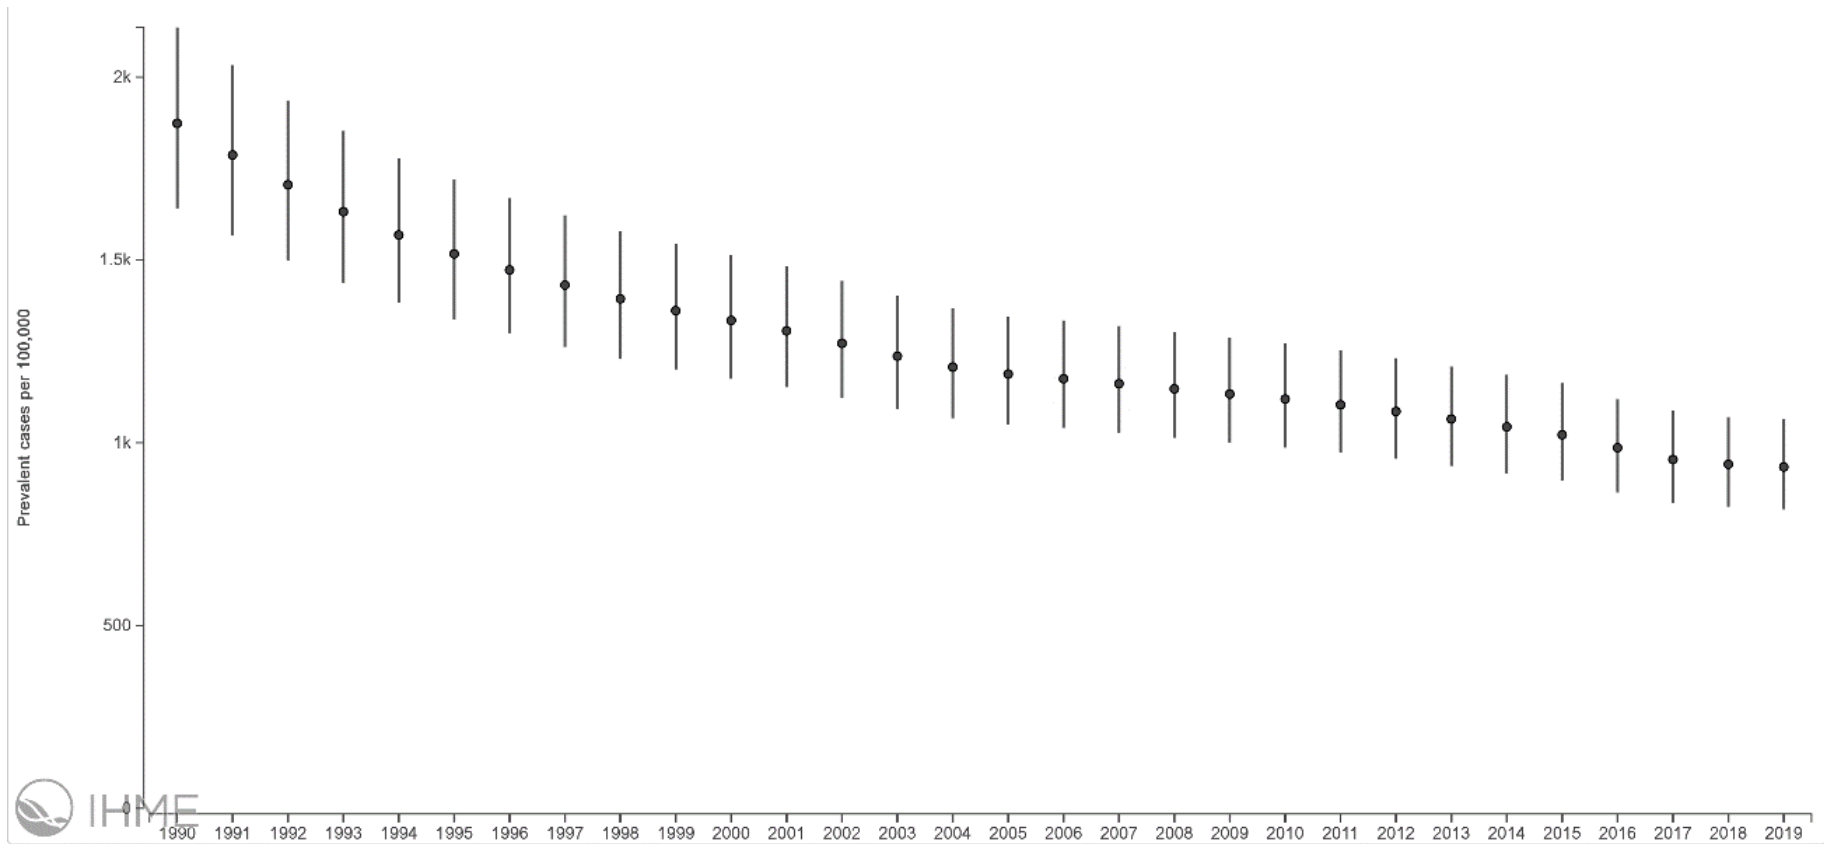

**Supplementary Figure 6.** Chagas Disease (CD) age-adjusted prevalence rate per 100,000 population in the Latin American Region from 1990 to 2019.

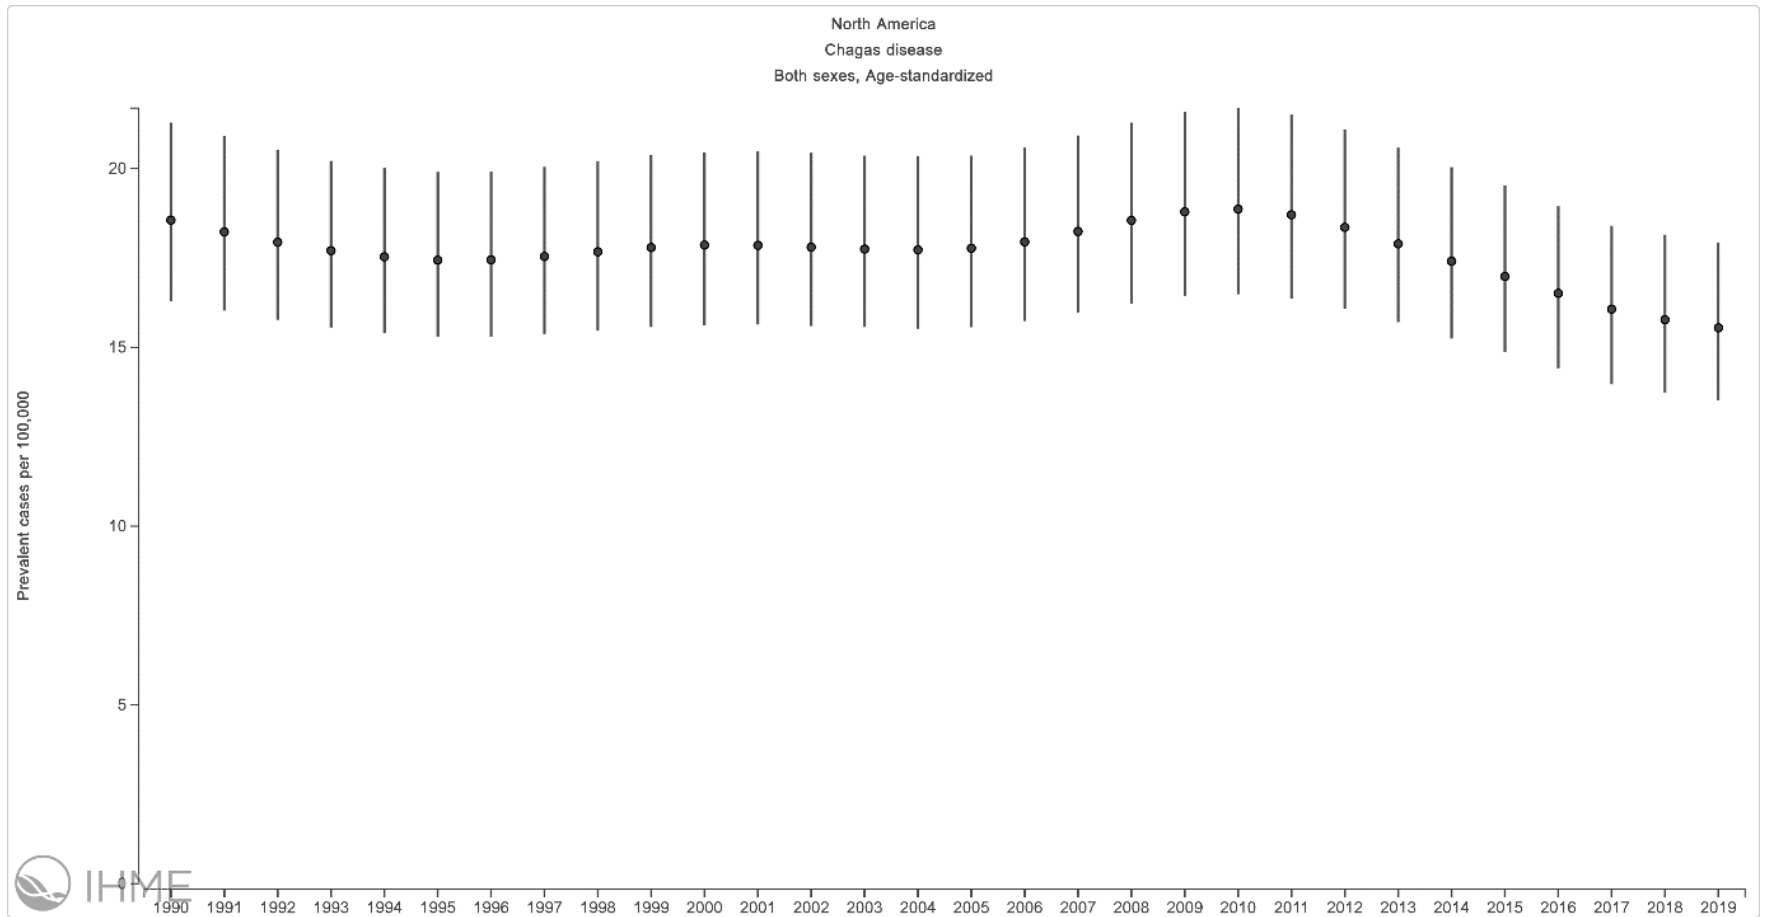

**Supplementary Figure 7.** Chagas Disease (CD) age-adjusted prevalence rate per 100,000 population in North America from 1990 to 2019.



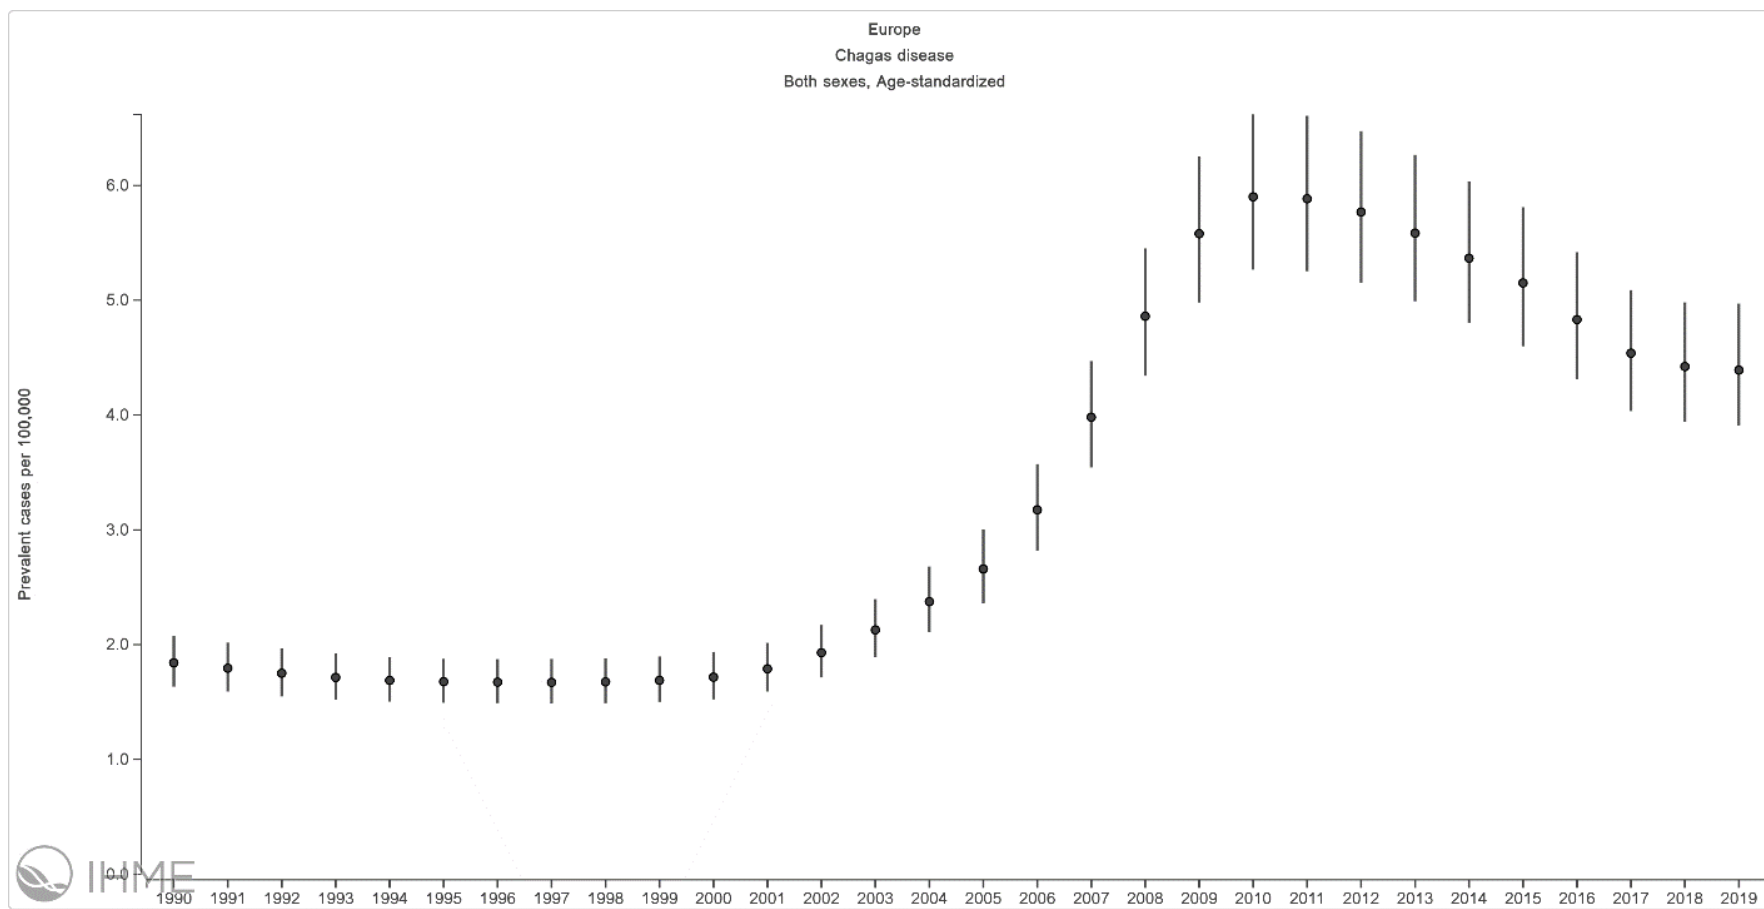

**Supplementary Figure 8.** Chagas Disease (CD) age-adjusted prevalence rate per 100,000 population in the European Region from 1990 to 2019.

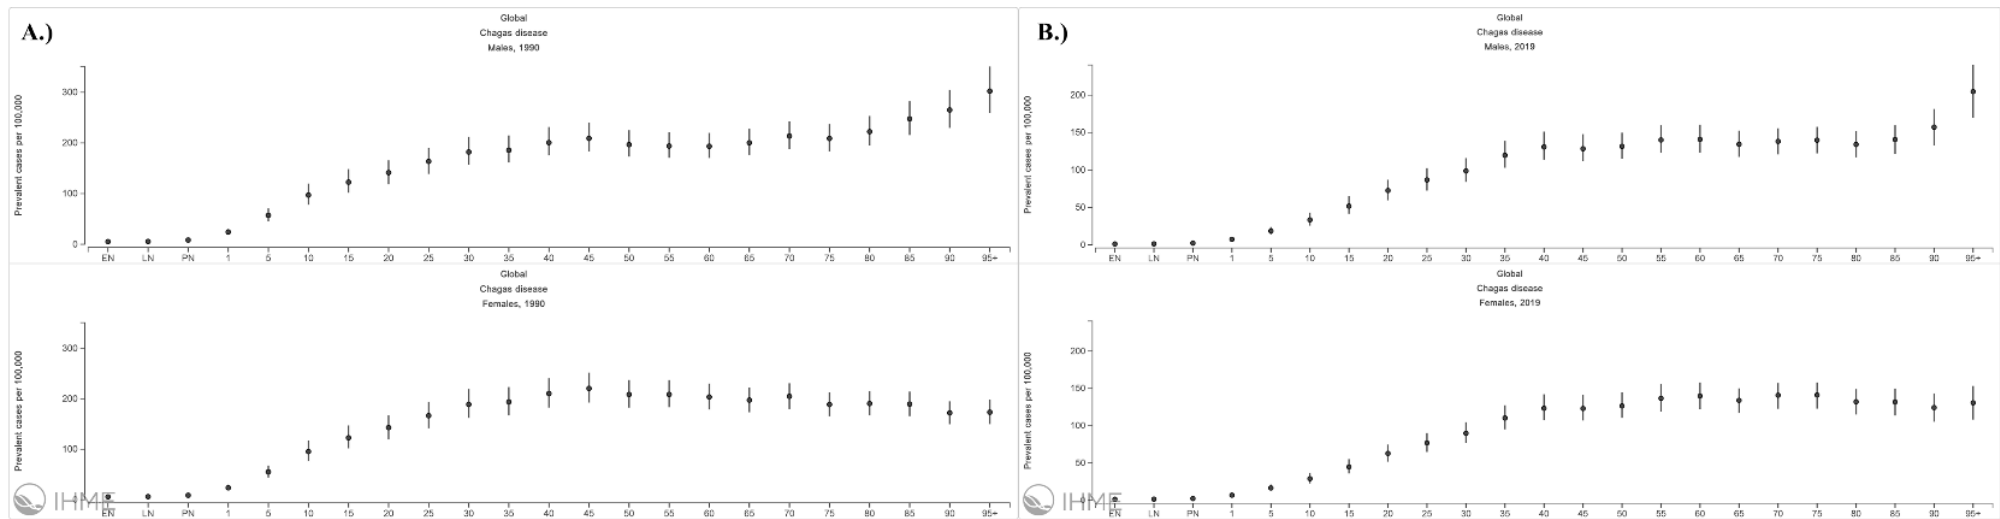

**Supplementary Figure 9.** Global Chagas Disease prevalence rate per 100,000 population by age and sex in A.) 1990 and B.) 2019.

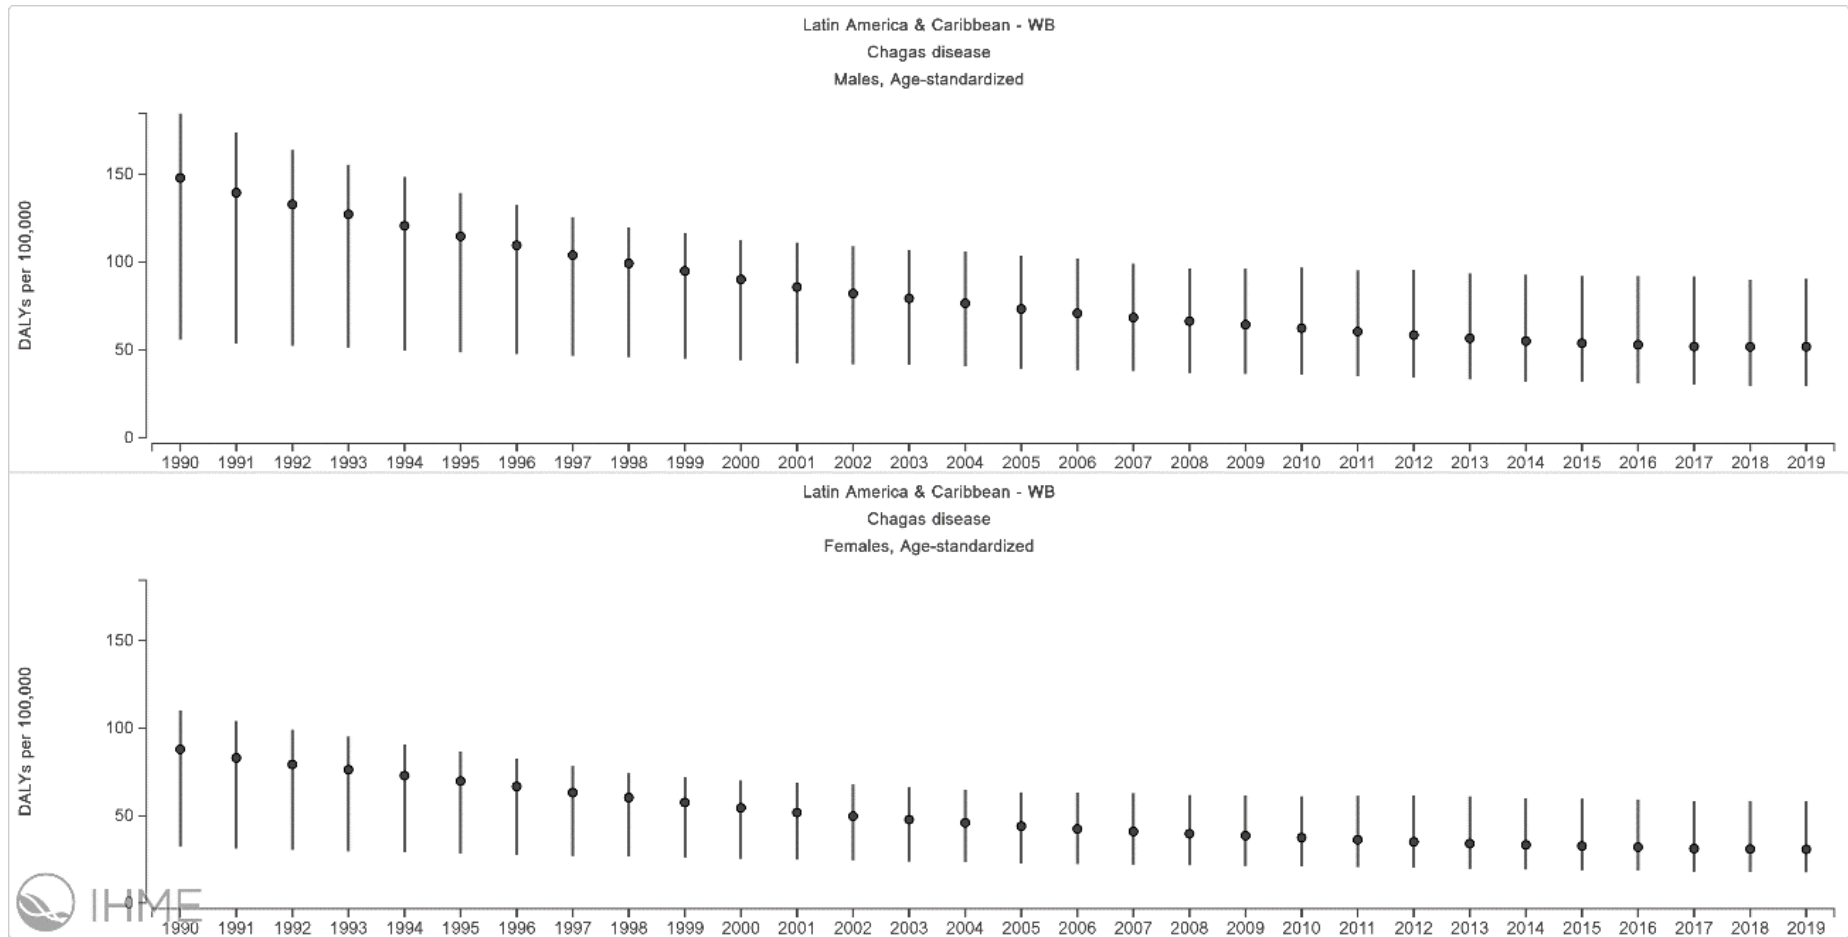

**Supplementary Figure 10.** Chagas Disease disability-adjusted life-years (DALYs) rate per 100,000 population in the Latin American Region by sex from 1990 to 2019.

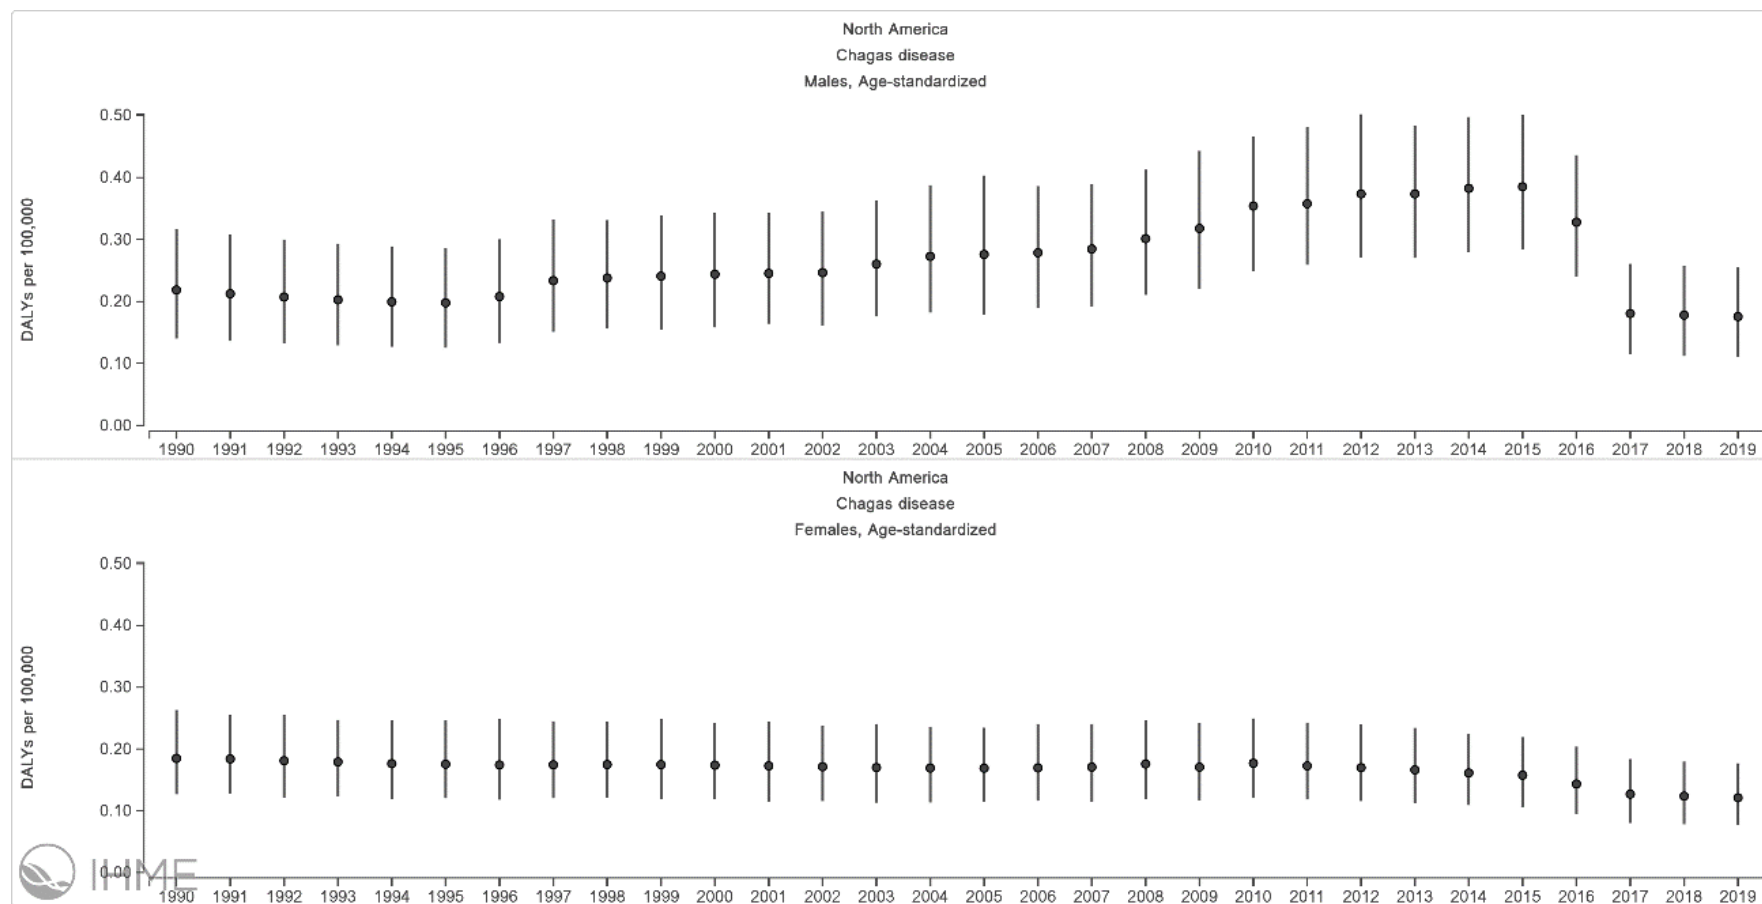

**Supplementary Figure 11.** Chagas Disease disability-adjusted life-years (DALYs) rate per 100,000 population in North America by sex from 1990 to 2019.

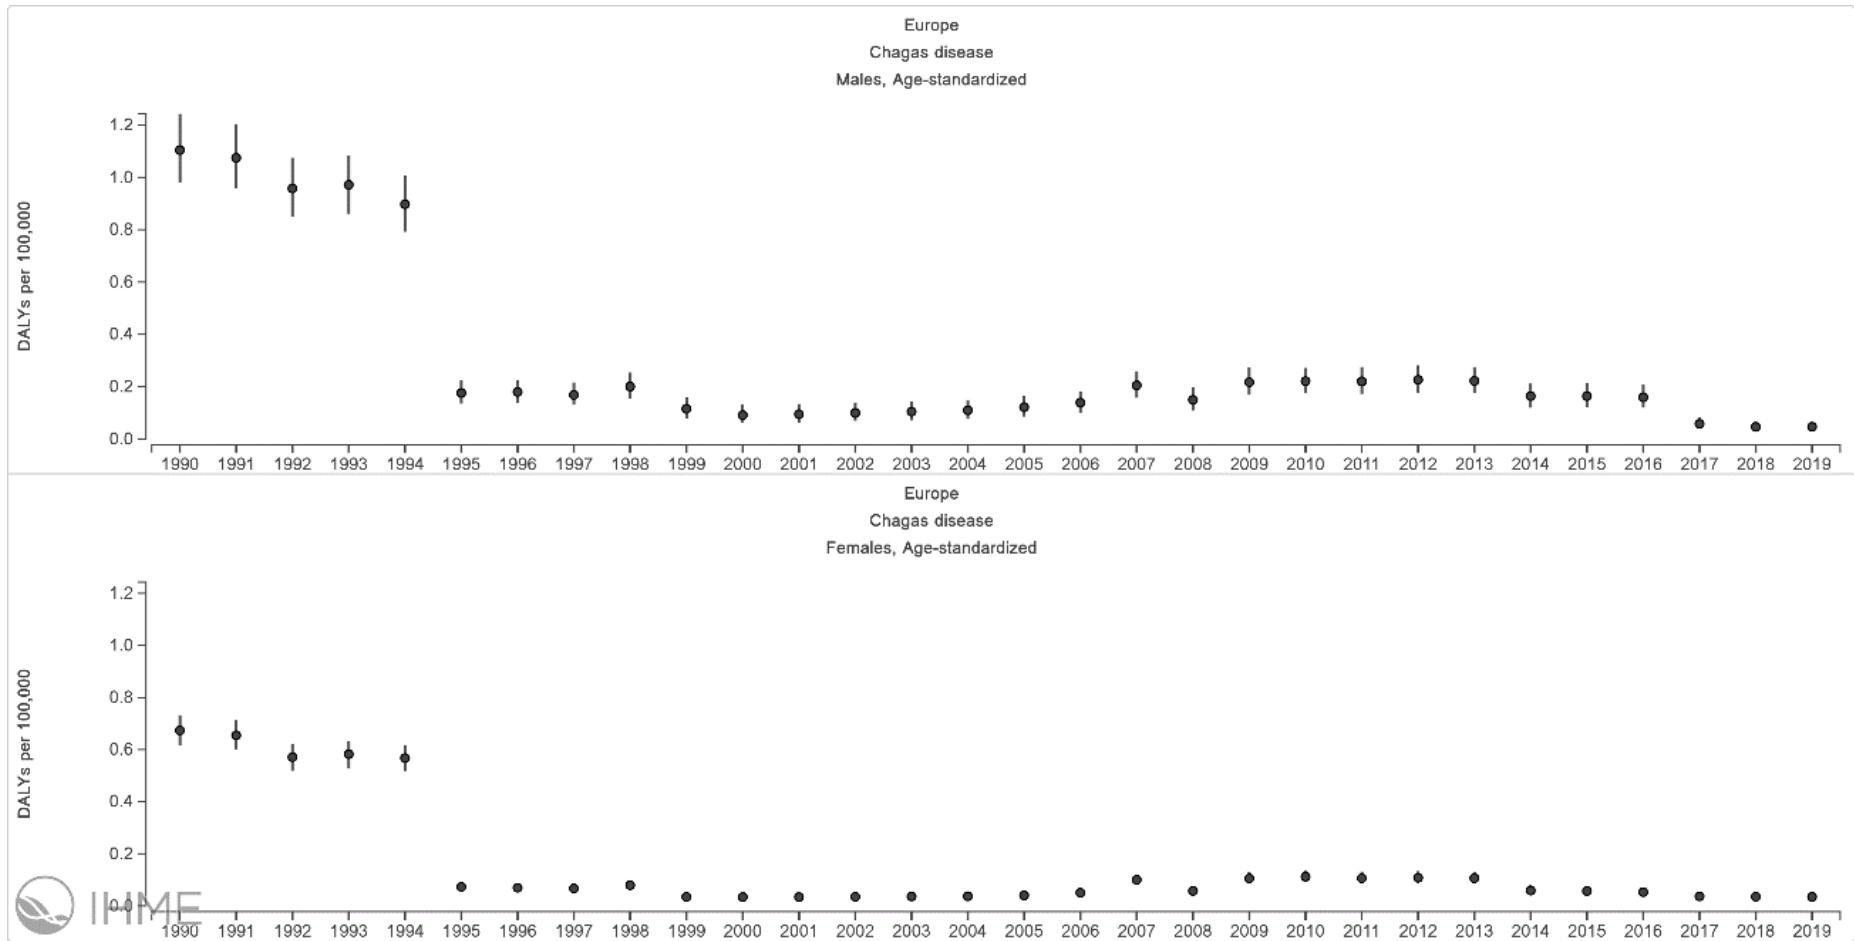

**Supplementary Figure 12.** Chagas Disease disability-adjusted life-years (DALYs) rate per 100,000 population in the European Region by sex from 1990 to 2019.

Global  
Chagas disease  
Males, Age-standardized

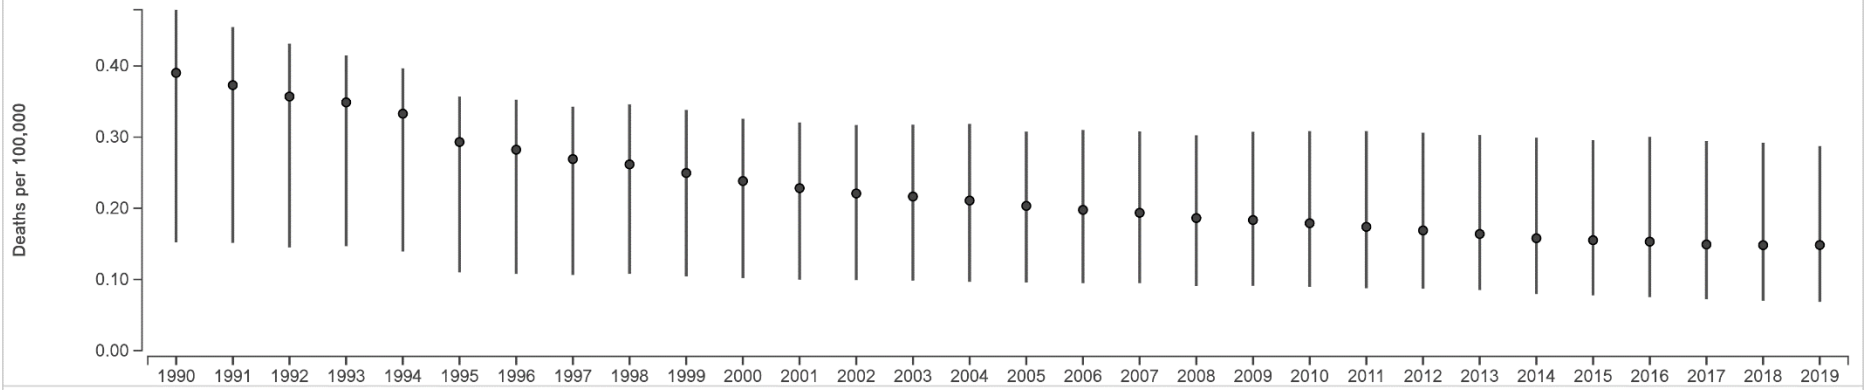

Global  
Chagas disease  
Females, Age-standardized

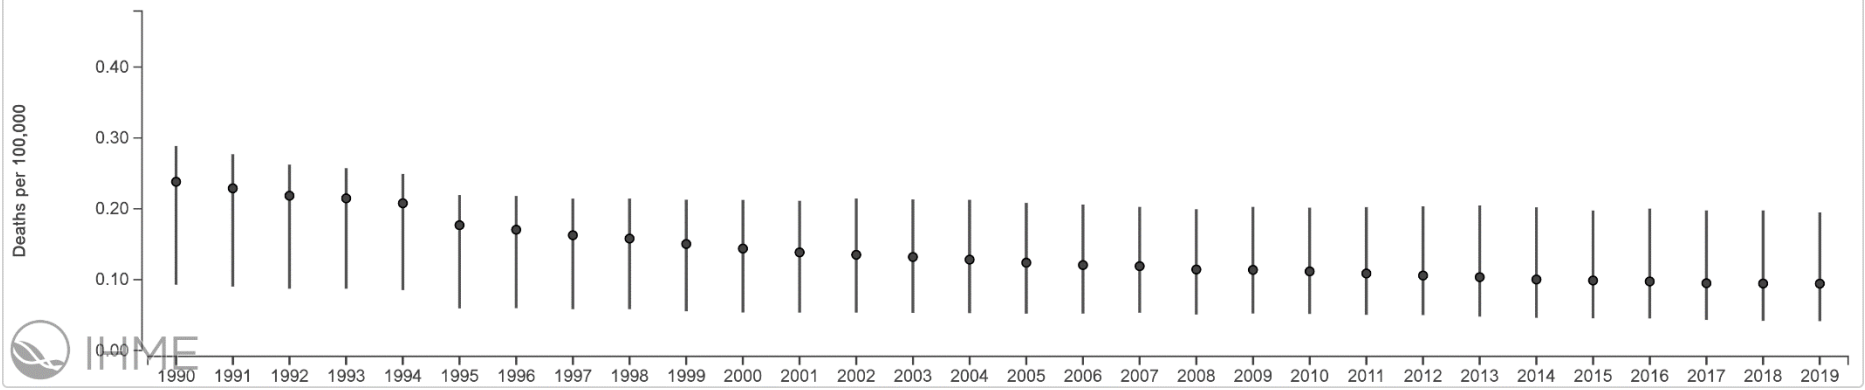

**Supplementary Figure 13.** Global Chagas Disease death rate per 100,000 population by sex from 1990 to 2019.

**Supplementary Table 1.** Number and age-standardized rate for Chagas Disease prevalence in 1990 and 2019 and the percentage change by country/US state.

| Country/State                           | Prevalence (rate per 100,000 population) 1990 | Prevalence (rate per 100,000 population) 2019 | Percentage Change 1990-2019 (%) | Prevalence number 1990            | Prevalence number 2019           | Percentage Change 1990-2019 (%) |
|-----------------------------------------|-----------------------------------------------|-----------------------------------------------|---------------------------------|-----------------------------------|----------------------------------|---------------------------------|
| <i>Andorra</i>                          | 12.38 (9.47- 15.75)                           | 16.79 (11.86- 23.43)                          | 35.62                           | 7.85 (5.98 - 9.97)                | 17.48 (12.15- 24.32)             | 122.56                          |
| <i>Antigua and Barbuda</i>              | 0.67 (0.53- 0.86)                             | 1.79 (0.93- 3.22)                             | 167.16                          | 0.35 (0.27 - 0.44)                | 1.85 (0.94- 3.40)                | 432.12                          |
| <i>Argentina</i>                        | 4987.04 (4423.46- 5566.96)                    | 1524.07 (1343.16- 1736.00)                    | -69.44                          | 1622896.4 (1441816.8 - 1811864.5) | 735490.88 (648796.81- 838063)    | -54.68                          |
| <i>Australia</i>                        | 14.01 (12.42- 15.78)                          | 4.49 (3.92- 5.20)                             | -67.95                          | 2561.94 (2270.29- 2886.15)        | 1302.89 (1133.42- 1496.13)       | -49.14                          |
| <i>Austria</i>                          | 2.21 (1.94- 2.52)                             | 1.23 (1.04- 1.45)                             | -44.34                          | 196.15 (172.17- 223.49)           | 132.49 (111.20- 156.01)          | -32.46                          |
| <i>Bahamas</i>                          | 0.33 (0.16- 0.53)                             | 1.46 (0.96- 2.15)                             | 342.42                          | 0.69 (0.35- 1.06)                 | 6.26 (4.12- 9.18)                | 812.67                          |
| <i>Barbados</i>                         | 0.18 (0.14- 0.24)                             | 0.17 (0.13- 0.23)                             | -5.56                           | 0.47 (0.37- 0.59)                 | 0.68 (0.52- 0.89)                | 46.01                           |
| <i>Belize</i>                           | 22.01 (16.99- 27.96)                          | 13.82 (10.41- 18.05)                          | -37.21                          | 28.28 (21.40- 36.68)              | 48.06 (36.11- 64.53)             | 69.94                           |
| <i>Bermuda</i>                          | 0.01 (0.01- 0.01)                             | 0.02 (0.01- 0.02)                             | 100.00                          | 0.01 (0.00- 0.01)                 | 0.01 (0.01- 0.02)                | 151.30                          |
| <i>Bolivia (Plurinational State of)</i> | 14498.60 (12803.28- 16303.82)                 | 4993.53 (4540.19- 5483.11)                    | -65.56                          | 795786.94 (700556.5- 899392.56)   | 556181.13 (507218.66- 611029.13) | -30.11                          |
| <i>Brazil</i>                           | 1463.32 (1240.20- 1711.31)                    | 912.36 (788.20- 1048.06)                      | -37.65                          | 1918996.9 (1616752.4- 2249374.3)  | 2164570.3 (1868033.1- 2483588.8) | 12.80                           |
| <i>Canada</i>                           | 12.62 (11.15- 14.37)                          | 7.29 (6.34- 8.37)                             | -42.23                          | 3843.56 (3399.36- 4378.21)        | 3168.60 (2762.52- 3617.78)       | -17.56                          |
| <i>Chile</i>                            | 3911.59 (3485.31- 4430.37)                    | 1114.17 (987.04- 1261.69)                     | -71.52                          | 503984.09 (448713.91- 571287.44)  | 247197.23 (219291.86- 279687.94) | -50.95                          |
| <i>Colombia</i>                         | 468.44 (400.30- 545.60)                       | 240.60 (206.44- 280.79)                       | -48.64                          | 127234.67 (107715.62- 149349.77)  | 123429.94 (105866.1- 144254.94)  | -2.99                           |

|                           |                            |                           |         |                                  |                                  |         |
|---------------------------|----------------------------|---------------------------|---------|----------------------------------|----------------------------------|---------|
| <b>Costa Rica</b>         | 896.06 (744.08- 1069.90)   | 449.12 (372.40- 526.10)   | -49.88  | 22965.70 (18965.57- 27498.37)    | 22954.49 (18962.20- 26926.05)    | -0.05   |
| <b>Cuba</b>               | 0.99 (0.86- 1.14)          | 0.13 (0.09- 0.18)         | -86.87  | 107.13 (92.91- 122.46)           | 17.78 (12.12- 24.42)             | -83.40  |
| <b>Denmark</b>            | 2.27 (1.97- 2.58)          | 2.05 (1.72- 2.40)         | -9.69   | 134.88 (117.23- 153.39)          | 137.31 (114.83- 161.24)          | 1.80    |
| <b>Dominica</b>           | 0.02 (0.01- 0.02)          | 0.57 (0.03- 2.30)         | 2750.00 | 0.01 (0.01- 0.01)                | 0.44 (0.03- 1.78)                | 4597.84 |
| <b>Dominican Republic</b> | 22.03 (19.35- 24.98)       | 7.02 (6.11- 8.13)         | -68.13  | 1060.87 (930.59- 1206.39)        | 732.03 (634.09- 847.80)          | -31.00  |
| <b>Ecuador</b>            | 1965.65 (1647.37- 2313.59) | 776.74 (653.95- 928.24)   | -60.48  | 167052.69 (139128.86- 197316.98) | 132898.13 (111731.95- 159078.03) | -20.45  |
| <b>El Salvador</b>        | 1292.21 (1104.18- 1516.38) | 576.32 (487.87- 670.43)   | -55.40  | 56107.54 (47588.09- 66221.41)    | 35519.66 (30012.51- 41400.86)    | -36.69  |
| <b>France</b>             | 3.22 (2.86- 3.64)          | 1.54 (1.34- 1.75)         | -52.17  | 2063.35 (1831.78- 2332.31)       | 1157.35 (1010.04- 1314.54)       | -43.91  |
| <b>Germany</b>            | 1.27 (1.13- 1.44)          | 0.65 (0.56- 0.74)         | -48.82  | 1194.84 (1055.05- 1354.01)       | 647.61 (563.53- 740.64)          | -45.80  |
| <b>Grenada</b>            | 1.94 (1.20- 2.74)          | 14.35 (8.82- 21.04)       | 639.69  | 1.18 (0.75- 1.63)                | 16.05 (9.90- 23.29)              | 1259.02 |
| <b>Guatemala</b>          | 1967.54 (1667.02- 2316.64) | 712.89 (605.96- 835.04)   | -63.77  | 121036.18 (101590.44- 143467.08) | 110211.03 (92889.24- 129231.16)  | -8.94   |
| <b>Guyana</b>             | 14.46 (11.54- 18.15)       | 12.15 (9.33- 15.55)       | -15.98  | 78.50 (61.36- 100.52)            | 85.70 (65.85- 111.84)            | 9.17    |
| <b>Honduras</b>           | 1903.46 (1616.01- 2215.56) | 904.78 (776.29- 1054.24)  | -52.47  | 66869.28 (56657.88- 78305.21)    | 76312.81 (65038.65- 88780.77)    | 14.12   |
| <b>Iceland</b>            | 0.07 (0.01- 0.15)          | 0.90 (0.45- 1.73)         | 1185.71 | 0.19 (0.03- 0.39)                | 3.45 (1.67- 6.55)                | 1725.41 |
| <b>Ireland</b>            | 0.13 (0.09- 0.18)          | 3.78 (3.31- 4.30)         | 2807.69 | 4.67 (3.22- 6.38)                | 215.85 (188.25- 246.38)          | 4525.73 |
| <b>Israel</b>             | 40.40 (35.63- 45.38)       | 10.32 (9.06- 11.77)       | -74.46  | 1841.69 (1621.90- 2067.95)       | 983.44 (864.63- 1119.86)         | -46.60  |
| <b>Italy</b>              | 4.78 (4.23- 5.36)          | 12.28 (10.87- 14.03)      | 156.90  | 3134.50 (2776.68- 3516.82)       | 8676.86 (7685.51- 9847.33)       | 176.82  |
| <b>Japan</b>              | 0.25 (0.22- 0.28)          | 0.52 (0.45- 0.60)         | 108.00  | 358.48 (313.68- 409.86)          | 751.24 (652.78- 863.21)          | 109.56  |
| <b>Luxembourg</b>         | 1.22 (0.89- 1.55)          | 0.70 (0.30- 1.35)         | -42.62  | 5.51 (4.07- 7.01)                | 5.35 (2.33- 10.28)               | -2.97   |
| <b>Mexico</b>             | 1347.48 (1120.54- 1614.53) | 1030.50 (877.70- 1205.66) | -23.52  | 939303.44 (769873.56- 1139743.9) | 1311109.6 (1115869.6- 1534459.9) | 39.58   |
| <b>Netherlands</b>        | 2.38 (2.10- 2.68)          | 2.15 (1.86- 2.46)         | -9.66   | 408.78 (361.65- 460.24)          | 431.16 (374.02- 492.83)          | 5.48    |
| <b>Nicaragua</b>          | 1559.28 (1313.79- 1843.13) | 668.67 (566.27- 779.08)   | -57.12  | 44839.46 (37587.15- 53213.13)    | 39908.47 (33606.16- 46667.06)    | -11.00  |



|                                           |                            |                            |        |                                  |                                  |        |
|-------------------------------------------|----------------------------|----------------------------|--------|----------------------------------|----------------------------------|--------|
| <b>Panama</b>                             | 1025.04 (858.28- 1200.76)  | 518.47 (434.29- 606.20)    | -49.42 | 21443.64 (17888.40- 25311.50)    | 21771.47 (18233.92- 25453.20)    | 1.53   |
| <b>Paraguay</b>                           | 1210.41 (1043.74- 1412.94) | 584.81 (500.48- 687.14)    | -51.68 | 40414.16 (34573.66- 47289.16)    | 39103.23 (33426.53- 46034.36)    | -3.24  |
| <b>Peru</b>                               | 1413.44 (1207.69- 1651.78) | 635.63 (552.15- 731.03)    | -55.03 | 256753.69 (218829.02- 302078.94) | 217437.05 (188880.84- 250655.31) | -15.31 |
| <b>Portugal</b>                           | 5.43 (4.71- 6.20)          | 5.44 (4.70- 6.28)          | 0.18   | 607.82 (528.29- 694.46)          | 702.11 (609.11- 804.98)          | 15.51  |
| <b>Puerto Rico</b>                        | 8.53 (7.44- 9.76)          | 11.76 (10.12- 13.64)       | 37.87  | 306.48 (267.45- 350.01)          | 495.37 (428.09- 571.79)          | 61.63  |
| <b>Saint Lucia</b>                        | 0.68 (0.37- 1.01)          | 0.96 (0.22- 2.12)          | 41.18  | 0.65 (0.37- 0.96)                | 2.03 (0.47- 4.46)                | 211.56 |
| <b>Saint Vincent and the Grenadines</b>   | 0.09 (0.07- 0.12)          | 0.15 (0.12- 0.20)          | 66.67  | 0.07 (0.05- 0.09)                | 0.20 (0.15- 0.26)                | 182.77 |
| <b>Spain</b>                              | 13.62 (12.05- 15.37)       | 55.76 (49.65- 63.12)       | 309.40 | 5783.02 (5115.92- 6522.33)       | 30863.88 (27428.64- 34841.59)    | 433.70 |
| <b>Suriname</b>                           | 11.14 (7.68- 15.12)        | 6.04 (4.31- 7.93)          | -45.78 | 33.81 (22.87- 46.17)             | 36.10 (25.78- 47.80)             | 6.76   |
| <b>Sweden</b>                             | 17.72 (15.77- 20.00)       | 8.59 (7.53- 9.80)          | -51.52 | 1718.83 (1527.38- 1939.41)       | 1007.12 (880.97- 1148.46)        | -41.41 |
| <b>Switzerland</b>                        | 12.34 (10.92- 13.90)       | 9.49 (8.39- 10.81)         | -23.10 | 1001.75 (885.63- 1131.16)        | 1015.87 (895.60- 1153.04)        | 1.41   |
| <b>Trinidad and Tobago</b>                | 5.40 (4.69- 6.27)          | 2.06 (1.49- 2.74)          | -61.85 | 52.91 (45.81- 61.25)             | 34.29 (24.47- 45.91)             | -35.19 |
| <b>United Kingdom</b>                     | 0.12 (0.11- 0.14)          | 0.18 (0.16- 0.21)          | 50.00  | 77.61 (68.82- 87.41)             | 145.66 (127.51- 165.99)          | 87.68  |
| <b>Uruguay</b>                            | 1529.56 (1289.07- 1792.29) | 572.50 (486.99- 669.22)    | -62.57 | 49440.20 (41739.49- 57864.70)    | 24746.50 (21094.78- 28855.29)    | -49.95 |
| <b>Venezuela (Bolivarian Republic of)</b> | 2888.71 (2495.06- 3327.43) | 1654.73 (1439.50- 1897.81) | -42.72 | 457479.5 (392331.28- 530739.19)  | 493902.31 (429738.44- 564220)    | 7.96   |
| <b>United States of America</b>           | 19.22 (16.84- 22.10)       | 16.50 (14.34- 19.04)       | -14.15 | 53505.66 (46913.63- 61492.67)    | 63553.17 (55365.83- 72997.92)    | 18.78  |
| <b>Alabama</b>                            | 4.14 (3.59- 4.80)          | 4.24 (3.66- 4.92)          | 2.52   | 187.38 (162.46 - 217.40)         | 246.44 (213.10 - 285.07)         | 31.52  |
| <b>Alaska</b>                             | 10.36 (9.15- 11.81)        | 5.38 (4.71- 6.15)          | -48.06 | 44.95 (39.66 - 51.42)            | 48.33 (42.33 - 55.27)            | 7.51   |
| <b>Arizona</b>                            | 9.98 (8.70- 11.51)         | 5.94 (5.15- 6.87)          | -40.49 | 397.75 (346.89 - 459.10)         | 497.10 (431.29 - 572.98)         | 24.98  |
| <b>Arkansas</b>                           | 6.70 (5.80- 7.78)          | 6.75 (5.81- 7.84)          | 0.76   | 175.89 (151.95 - 204.29)         | 237.74 (205.11 - 275.43)         | 35.16  |

|                             |                      |                      |        |                               |                                |       |
|-----------------------------|----------------------|----------------------|--------|-------------------------------|--------------------------------|-------|
| <b>California</b>           | 32.19 (27.95- 37.31) | 28.55 (24.68- 33.10) | -11.30 | 10364.56 (8989.40 - 12023.65) | 13600.26 (11761.55 - 15730.08) | 31.22 |
| <b>Colorado</b>             | 8.62 (7.57- 9.90)    | 5.69 (4.95- 6.56)    | -34.03 | 313.21 (275.08 - 359.43)      | 364.36 (317.80 - 417.98)       | 16.33 |
| <b>Connecticut</b>          | 24.77 (21.86- 28.27) | 22.64 (19.87- 25.99) | -8.63  | 942.72 (832.26 - 1077.58)     | 983.27 (862.41 - 1121.62)      | 4.30  |
| <b>Delaware</b>             | 13.14 (11.46- 15.17) | 10.91 (9.45- 12.64)  | -16.97 | 98.56 (85.92 - 113.83)        | 123.91 (107.46 - 142.84)       | 25.72 |
| <b>District of Columbia</b> | 37.48 (32.65- 43.29) | 42.85 (37.20- 49.53) | 14.31  | 266.39 (232.02 - 308.27)      | 337.05 (291.97 - 388.99)       | 26.52 |
| <b>Florida</b>              | 60.67 (53.51- 69.45) | 39.16 (34.25- 45.02) | -35.45 | 8894.82 (7840.39 - 10176.39)  | 9682.26 (8474.04 - 11081.36)   | 8.85  |
| <b>Georgia</b>              | 17.69 (15.49- 20.32) | 12.02 (10.44- 13.85) | -32.07 | 1251.85 (1096.69 - 1439.61)   | 1502.09 (1307.52 - 1726.49)    | 19.99 |
| <b>Hawaii</b>               | 2.65 (2.34- 3.03)    | 2.02 (1.77- 2.32)    | -23.97 | 32.63 (28.79 - 37.32)         | 35.00 (30.65 - 40.03)          | 7.27  |
| <b>Idaho</b>                | 5.65 (4.94- 6.50)    | 3.74 (3.25- 4.32)    | -33.69 | 60.20 (52.72 - 69.24)         | 72.54 (63.12 - 83.38)          | 20.49 |
| <b>Illinois</b>             | 7.31 (6.43- 8.38)    | 6.94 (6.04- 7.99)    | -5.10  | 934.29 (821.34 - 1071.33)     | 1069.14 (933.22 - 1225.86)     | 14.43 |
| <b>Indiana</b>              | 3.56 (3.11- 4.10)    | 3.51 (3.04- 4.05)    | -1.57  | 220.63 (192.77 - 254.28)      | 271.74 (236.06 - 312.92)       | 23.16 |
| <b>Iowa</b>                 | 3.61 (3.15- 4.16)    | 3.86 (3.35- 4.46)    | 6.82   | 111.25 (97.22 - 128.20)       | 136.74 (118.82 - 157.45)       | 22.92 |
| <b>Kansas</b>               | 4.02 (3.51- 4.62)    | 3.96 (3.44- 4.58)    | -1.42  | 108.97 (95.26 - 125.54)       | 133.63 (116.15 - 153.84)       | 22.63 |
| <b>Kentucky</b>             | 2.81 (2.45- 3.25)    | 2.82 (2.44- 3.27)    | 0.54   | 116.55 (101.58 - 134.80)      | 148.23 (128.43 - 171.03)       | 27.19 |
| <b>Louisiana</b>            | 9.87 (8.53- 11.46)   | 11.23 (9.68- 13.03)  | 13.85  | 445.17 (384.65 - 517.03)      | 599.41 (517.32 - 694.21)       | 34.65 |
| <b>Maine</b>                | 3.17 (2.76- 3.66)    | 3.61 (3.12- 4.19)    | 14.08  | 44.09 (38.40 - 51.03)         | 56.40 (48.85 - 65.10)          | 27.92 |
| <b>Maryland</b>             | 39.31 (34.18- 45.48) | 37.65 (32.55- 43.66) | -4.23  | 2133.10 (1854.11 - 2472.47)   | 2760.17 (2388.22 - 3188.78)    | 29.40 |
| <b>Massachusetts</b>        | 23.95 (21.07- 27.45) | 23.23 (20.26- 26.71) | -2.99  | 1637.90 (1441.21 - 1876.57)   | 1847.90 (1614.29 - 2117.59)    | 12.82 |
| <b>Michigan</b>             | 2.47 (2.17- 2.84)    | 2.71 (2.36- 3.14)    | 9.74   | 255.62 (224.22 - 293.60)      | 301.52 (262.78 - 346.21)       | 17.96 |
| <b>Minnesota</b>            | 7.31 (6.41- 8.39)    | 6.38 (5.55- 7.36)    | -12.68 | 350.60 (307.62 - 402.60)      | 411.79 (358.98 - 472.74)       | 17.45 |
| <b>Mississippi</b>          | 2.42 (2.11- 2.81)    | 2.46 (2.13- 2.86)    | 1.65   | 66.49 (57.89 - 76.97)         | 85.19 (73.76 - 98.34)          | 28.11 |
| <b>Missouri</b>             | 3.85 (3.36- 4.44)    | 3.80 (3.30- 4.40)    | -1.37  | 221.25 (193.10 - 255.19)      | 274.97 (238.69 - 316.80)       | 24.28 |

|                       |                      |                      |        |                             |                             |       |
|-----------------------|----------------------|----------------------|--------|-----------------------------|-----------------------------|-------|
| <b>Montana</b>        | 2.64 (2.31- 3.04)    | 2.36 (2.05- 2.73)    | -10.70 | 23.40 (20.52 - 26.90)       | 27.80 (24.22 - 31.93)       | 18.79 |
| <b>Nebraska</b>       | 6.68 (5.78- 7.75)    | 7.12 (6.13- 8.26)    | 6.56   | 115.31 (99.67 - 133.91)     | 154.72 (133.57 - 179.17)    | 34.17 |
| <b>Nevada</b>         | 44.31 (38.57- 51.31) | 19.51 (16.88- 22.61) | -55.97 | 576.52 (501.05 - 668.32)    | 749.09 (648.11 - 865.54)    | 29.93 |
| <b>New Hampshire</b>  | 5.82 (5.13- 6.68)    | 5.08 (4.43- 5.86)    | -12.79 | 72.07 (63.45 - 82.62)       | 80.26 (70.15 - 91.95)       | 11.36 |
| <b>New Jersey</b>     | 45.04 (39.77- 51.48) | 40.61 (35.61- 46.61) | -9.82  | 4041.28 (3565.47 - 4622.57) | 4338.88 (3799.74 - 4961.83) | 7.36  |
| <b>New Mexico</b>     | 5.48 (4.80- 6.30)    | 4.30 (3.73- 4.96)    | -21.68 | 88.77 (77.70 - 102.14)      | 107.63 (93.63 - 123.74)     | 21.24 |
| <b>New York</b>       | 38.32 (33.83- 43.82) | 36.11 (31.63- 41.35) | -5.79  | 7913.06 (6979.19 - 9051.46) | 8528.05 (7467.97 - 9755.54) | 7.77  |
| <b>North Carolina</b> | 13.76 (12.00- 15.89) | 10.54 (9.13- 12.21)  | -23.40 | 1036.79 (903.81 - 1198.20)  | 1309.63 (1135.29 - 1510.47) | 26.32 |
| <b>North Dakota</b>   | 4.24 (3.72- 4.86)    | 4.17 (3.63- 4.80)    | -1.70  | 28.93 (25.42 - 33.20)       | 33.42 (29.16 - 38.33)       | 15.52 |
| <b>Ohio</b>           | 2.14 (1.88- 2.45)    | 2.30 (2.00- 2.65)    | 7.35   | 260.82 (228.91 - 299.44)    | 305.77 (266.58 - 350.95)    | 17.23 |
| <b>Oklahoma</b>       | 4.42 (3.84- 5.13)    | 4.50 (3.88- 5.22)    | 1.80   | 155.24 (134.58 - 180.12)    | 204.37 (176.72 - 236.42)    | 31.65 |
| <b>Oregon</b>         | 5.38 (4.70- 6.19)    | 4.39 (3.81- 5.07)    | -18.42 | 172.93 (151.38 - 199.04)    | 209.35 (182.10 - 240.82)    | 21.06 |
| <b>Pennsylvania</b>   | 5.17 (4.55- 5.92)    | 5.25 (4.58- 6.05)    | 1.66   | 701.27 (617.02 - 803.37)    | 791.78 (691.63 - 907.30)    | 12.91 |
| <b>Rhode Island</b>   | 26.15 (22.75- 30.25) | 30.46 (26.36- 35.31) | 16.48  | 296.28 (258.03 - 342.89)    | 378.63 (327.92 - 437.04)    | 27.80 |
| <b>South Carolina</b> | 8.60 (7.55- 9.87)    | 6.58 (5.72- 7.60)    | -23.52 | 330.77 (290.45 - 379.59)    | 385.47 (336.17 - 442.24)    | 16.54 |
| <b>South Dakota</b>   | 5.38 (4.69- 6.21)    | 5.18 (4.49- 6.00)    | -3.73  | 39.85 (34.75 - 46.00)       | 49.88 (43.27 - 57.49)       | 25.18 |
| <b>Tennessee</b>      | 6.45 (5.62- 7.46)    | 5.81 (5.03- 6.73)    | -10.02 | 360.03 (313.75 - 416.45)    | 458.25 (397.02 - 528.78)    | 27.28 |
| <b>Texas</b>          | 24.80 (21.57- 28.72) | 17.62 (15.25- 20.42) | -28.96 | 4468.89 (3884.64 - 5179.59) | 5780.83 (5001.98 - 6678.14) | 29.36 |
| <b>Utah</b>           | 22.72 (20.00- 26.03) | 11.87 (10.37- 13.61) | -47.75 | 361.10 (317.89 - 413.86)    | 400.67 (350.16 - 459.04)    | 10.96 |
| <b>Vermont</b>        | 5.48 (4.80- 6.30)    | 5.64 (4.91- 6.53)    | 2.89   | 34.41 (30.17 - 39.55)       | 40.86 (35.60 - 46.93)       | 18.74 |
| <b>Virginia</b>       | 31.04 (27.09- 35.74) | 25.85 (22.43- 29.88) | -16.73 | 2162.02 (1887.05 - 2493.28) | 2682.47 (2328.80 - 3090.51) | 24.07 |
| <b>Washington</b>     | 7.01 (6.13- 8.06)    | 5.39 (4.68- 6.24)    | -23.07 | 380.37 (332.50 - 438.24)    | 466.57 (405.52 - 537.14)    | 22.66 |

|                      |                   |                   |        |                          |                          |       |
|----------------------|-------------------|-------------------|--------|--------------------------|--------------------------|-------|
| <i>West Virginia</i> | 1.73 (1.51- 1.99) | 1.98 (1.72- 2.29) | 14.53  | 35.55 (31.14 - 40.88)    | 42.69 (37.16 - 49.08)    | 20.11 |
| <i>Wisconsin</i>     | 2.76 (2.42- 3.16) | 2.50 (2.18- 2.89) | -9.20  | 149.07 (131.05 - 170.90) | 170.28 (148.65 - 195.23) | 14.23 |
| <i>Wyoming</i>       | 4.96 (4.35- 5.70) | 4.09 (3.55- 4.72) | -17.54 | 24.11 (21.14 - 27.71)    | 28.64 (24.95 - 32.90)    | 18.77 |

**Supplementary Table 2.** Number of disability-adjusted life-years and age-standardized disability-adjusted life-year rates (per 100,000 population) due to Chagas disease in 1990 and 2019 and the percentage change by country/US state.

| Country/State                           | DALY rate per 100,000 population in 1990 | DALY rate per 100,000 population in 2019 | Percentage Change 1990-2019 (%) | DALYs (number) 1990              | DALYs (number) 2019               | Percentage Change 1990-2019 (%) |
|-----------------------------------------|------------------------------------------|------------------------------------------|---------------------------------|----------------------------------|-----------------------------------|---------------------------------|
| <i>Andorra</i>                          | 0.11 (0.06 - 0.18)                       | 0.15 (0.09 - 0.26)                       | 34.65                           | 0.07 (0.04 - 0.11)               | 0.18 (0.10 - 0.31)                | 154.20                          |
| <i>Argentina</i>                        | 116.02 (69.25 - 184.24)                  | 45.77 (28.66 - 119.24)                   | -60.54                          | 36724.31 (21979.75 - 58618.17)   | 23552.58 (14648.12 - 61744.26)    | -35.87                          |
| <i>Australia</i>                        | 0.14 (0.09 - 0.20)                       | 0.04 (0.03 - 0.06)                       | -69.48                          | 25.55 (16.61 - 37.03)            | 13.82 (8.74 - 20.32)              | -45.92                          |
| <i>Austria</i>                          | 0.02 (0.01 - 0.03)                       | 0.01 (0.01 - 0.02)                       | -45.22                          | 1.91 (1.23 - 2.78)               | 1.37 (0.84 - 2.01)                | -28.33                          |
| <i>Belgium</i>                          | 3.86 (2.94 - 4.81)                       | 0.00 (0.00 - 0.00)                       | -100.00                         | 583.01 (443.89 - 723.71)         | 0.00 (0.00 - 0.00)                | -100.00                         |
| <i>Belize</i>                           | 3.68 (1.34 - 5.16)                       | 1.13 (0.71 - 2.58)                       | -69.29                          | 3.25 (1.22 - 4.52)               | 2.83 (1.83 - 6.29)                | -12.80                          |
| <i>Bolivia (Plurinational State of)</i> | 339.96 (143.26 - 531.52)                 | 183.76 (64.92 - 328.59)                  | -45.95                          | 12503.39 (5668.15 - 18939.51)    | 16882.47 (6156.26 - 29128.09)     | 35.02                           |
| <i>Brazil</i>                           | 245.46 (80.79 - 312.29)                  | 72.32 (44.93 - 125.48)                   | -70.54                          | 256380.58 (81679.58 - 328720.59) | 174194.22 (109039.60 - 302974.38) | -32.06                          |
| <i>Canada</i>                           | 0.20 (0.12 - 0.33)                       | 0.07 (0.04 - 0.10)                       | -66.96                          | 60.26 (36.70 - 96.26)            | 33.92 (21.43 - 49.37)             | -43.71                          |
| <i>Chile</i>                            | 40.65 (29.20 - 53.75)                    | 18.01 (12.87 - 24.02)                    | -55.71                          | 4594.70 (3259.73 - 6165.39)      | 4195.56 (2987.86 - 5587.42)       | -8.69                           |
| <i>Colombia</i>                         | 12.26 (9.12 - 21.27)                     | 10.34 (4.79 - 15.53)                     | -15.67                          | 2617.90 (1966.51 - 4186.43)      | 5426.21 (2529.02 - 8181.17)       | 107.27                          |
| <i>Costa Rica</i>                       | 9.07 (5.99 - 12.69)                      | 4.59 (2.96 - 6.59)                       | -49.38                          | 189.64 (123.37 - 270.83)         | 237.21 (152.93 - 341.43)          | 25.08                           |
| <i>Cuba</i>                             | 0.58 (0.23 - 1.11)                       | 0.00 (0.00 - 0.00)                       | -99.80                          | 57.16 (22.84 - 109.68)           | 0.17 (0.09 - 0.29)                | -99.70                          |
| <i>Denmark</i>                          | 0.02 (0.01 - 0.03)                       | 0.02 (0.01 - 0.03)                       | -9.83                           | 1.32 (0.85 - 1.94)               | 1.43 (0.89 - 2.18)                | 8.47                            |
| <i>Dominican Republic</i>               | 0.26 (0.17 - 0.38)                       | 0.08 (0.05 - 0.11)                       | -69.79                          | 10.77 (6.91 - 15.67)             | 7.76 (4.88 - 11.17)               | -27.97                          |

|                    |                       |                       |         |                             |                               |         |
|--------------------|-----------------------|-----------------------|---------|-----------------------------|-------------------------------|---------|
| <i>Ecuador</i>     | 24.84 (17.14 - 33.00) | 9.75 (6.52 - 14.89)   | -60.76  | 1564.36 (1087.03 - 2095.39) | 1530.68 (1023.59 - 2342.76)   | -2.15   |
| <i>El Salvador</i> | 26.84 (17.48 - 39.51) | 12.67 (8.19 - 21.96)  | -52.79  | 918.93 (594.81 - 1293.11)   | 759.50 (489.69 - 1314.18)     | -17.35  |
| <i>Finland</i>     | 1.37 (0.67 - 2.37)    | 0.00 (0.00 - 0.00)    | -100.00 | 88.20 (42.83 - 151.93)      | 0.00 (0.00 - 0.00)            | -100.00 |
| <i>France</i>      | 0.16 (0.06 - 0.30)    | 0.01 (0.01 - 0.02)    | -91.35  | 121.07 (45.87 - 228.55)     | 12.22 (7.85 - 17.92)          | -89.91  |
| <i>Germany</i>     | 4.32 (3.97 - 4.69)    | 0.01 (0.00 - 0.01)    | -99.87  | 5192.56 (4789.89 - 5646.65) | 6.83 (4.33 - 10.00)           | -99.87  |
| <i>Guatemala</i>   | 26.62 (18.56 - 35.18) | 9.98 (7.11 - 14.11)   | -62.50  | 1168.02 (815.76 - 1589.49)  | 1251.93 (877.03 - 1753.81)    | 7.18    |
| <i>Guyana</i>      | 4.13 (1.37 - 5.99)    | 1.21 (0.76 - 2.56)    | -70.82  | 11.86 (4.23 - 16.56)        | 5.95 (3.80 - 12.17)           | -49.80  |
| <i>Honduras</i>    | 24.53 (14.65 - 33.85) | 15.80 (7.81 - 24.79)  | -35.61  | 607.24 (384.35 - 843.46)    | 1003.25 (538.33 - 1518.92)    | 65.21   |
| <i>Israel</i>      | 2.65 (1.43 - 4.23)    | 0.10 (0.06 - 0.15)    | -96.20  | 97.14 (54.82 - 154.80)      | 10.19 (6.57 - 15.06)          | -89.51  |
| <i>Italy</i>       | 0.04 (0.03 - 0.06)    | 0.10 (0.07 - 0.15)    | 137.93  | 31.33 (20.24 - 45.16)       | 91.34 (58.99 - 133.67)        | 191.52  |
| <i>Jamaica</i>     | 3.26 (1.29 - 6.12)    | 0.00 (0.00 - 0.00)    | -100.00 | 57.82 (22.85 - 108.70)      | 0.00 (0.00 - 0.00)            | -100.00 |
| <i>Japan</i>       | 0.00 (0.00 - 0.00)    | 0.00 (0.00 - 0.01)    | 83.30   | 3.64 (2.36 - 5.28)          | 8.12 (5.16 - 11.87)           | 122.99  |
| <i>Luxembourg</i>  | 0.01 (0.01 - 0.02)    | 0.01 (0.00 - 0.01)    | -39.50  | 0.05 (0.03 - 0.07)          | 0.05 (0.02 - 0.11)            | 6.87    |
| <i>Mexico</i>      | 12.64 (8.35 - 17.93)  | 10.22 (6.79 - 14.28)  | -19.11  | 6933.23 (4479.72 - 9991.35) | 12533.67 (8303.68 - 17462.50) | 80.78   |
| <i>Netherlands</i> | 0.02 (0.01 - 0.03)    | 0.02 (0.01 - 0.03)    | -14.88  | 4.09 (2.66 - 5.94)          | 4.57 (2.92 - 6.66)            | 11.91   |
| <i>Nicaragua</i>   | 20.75 (13.90 - 28.09) | 9.12 (6.51 - 12.88)   | -56.02  | 411.15 (278.57 - 569.22)    | 451.35 (316.61 - 645.84)      | 9.78    |
| <i>Panama</i>      | 12.78 (8.70 - 16.96)  | 5.92 (3.78 - 8.69)    | -53.63  | 228.33 (151.79 - 307.84)    | 247.98 (159.04 - 364.28)      | 8.60    |
| <i>Paraguay</i>    | 55.93 (25.82 - 72.47) | 26.21 (15.76 - 44.77) | -53.14  | 1358.92 (659.02 - 1748.67)  | 1541.27 (947.25 - 2653.88)    | 13.42   |
| <i>Peru</i>        | 21.51 (13.69 - 28.98) | 8.84 (6.21 - 12.42)   | -58.89  | 2960.96 (1935.81 - 3997.53) | 2926.03 (2044.39 - 4115.21)   | -1.18   |
| <i>Portugal</i>    | 0.05 (0.03 - 0.08)    | 0.05 (0.03 - 0.07)    | -8.60   | 6.29 (3.98 - 9.15)          | 7.56 (4.76 - 11.25)           | 20.17   |
| <i>Puerto Rico</i> | 3.63 (1.90 - 5.96)    | 0.11 (0.07 - 0.16)    | -97.02  | 111.07 (58.79 - 181.71)     | 5.38 (3.40 - 7.94)            | -95.15  |
| <i>Spain</i>       | 0.31 (0.19 - 0.48)    | 0.48 (0.31 - 0.71)    | 54.91   | 157.85 (93.40 - 252.53)     | 322.37 (206.60 - 469.84)      | 104.23  |

|                                           |                         |                        |        |                                |                                |        |
|-------------------------------------------|-------------------------|------------------------|--------|--------------------------------|--------------------------------|--------|
| <i>Suriname</i>                           | 2.51 (0.98 - 3.57)      | 0.84 (0.50 - 1.99)     | -66.36 | 6.15 (2.40 - 8.65)             | 4.45 (2.73 - 10.32)            | -27.59 |
| <i>Sweden</i>                             | 0.16 (0.10 - 0.23)      | 0.08 (0.05 - 0.11)     | -50.97 | 17.10 (11.14 - 24.75)          | 10.53 (6.66 - 15.31)           | -38.40 |
| <i>Switzerland</i>                        | 0.11 (0.07 - 0.16)      | 0.08 (0.05 - 0.12)     | -25.16 | 9.96 (6.54 - 14.45)            | 10.61 (6.75 - 15.31)           | 6.52   |
| <i>Trinidad and Tobago</i>                | 0.06 (0.04 - 0.09)      | 0.02 (0.01 - 0.03)     | -65.73 | 0.55 (0.35 - 0.81)             | 0.37 (0.21 - 0.59)             | -32.31 |
| <i>United Kingdom</i>                     | 0.00 (0.00 - 0.00)      | 0.00 (0.00 - 0.00)     | 55.76  | 0.78 (0.50 - 1.12)             | 1.58 (1.00 - 2.29)             | 103.27 |
| <i>Uruguay</i>                            | 16.96 (10.66 - 23.34)   | 7.17 (4.80 - 9.84)     | -57.74 | 587.78 (373.08 - 808.67)       | 350.72 (237.93 - 484.18)       | -40.33 |
| <i>Venezuela (Bolivarian Republic of)</i> | 228.02 (99.96 - 285.06) | 92.55 (62.26 - 169.48) | -59.41 | 23314.70 (10840.66 - 28919.13) | 27037.40 (18134.19 - 50564.87) | 15.97  |
| <i>United States of America</i>           | 0.21 (0.14 - 0.29)      | 0.16 (0.10 - 0.23)     | -23.84 | 605.56 (401.39 - 862.61)       | 686.44 (433.59 - 1008.78)      | 13.36  |
| <i>Alabama</i>                            | 0.04 (0.03 - 0.06)      | 0.04 (0.03 - 0.06)     | -1.21  | 1.96 (1.25 - 2.86)             | 2.69 (1.69 - 3.95)             | 37.35  |
| <i>Alaska</i>                             | 0.15 (0.09 - 0.21)      | 0.06 (0.04 - 0.08)     | -62.13 | 0.45 (0.29 - 0.67)             | 0.52 (0.33 - 0.75)             | 13.61  |
| <i>Arizona</i>                            | 0.10 (0.06 - 0.15)      | 0.06 (0.04 - 0.08)     | -43.37 | 4.12 (2.65 - 6.04)             | 5.39 (3.39 - 7.93)             | 30.76  |
| <i>Arkansas</i>                           | 0.06 (0.04 - 0.09)      | 0.06 (0.04 - 0.10)     | -0.31  | 1.84 (1.18 - 2.70)             | 2.60 (1.63 - 3.82)             | 40.83  |
| <i>California</i>                         | 0.41 (0.27 - 0.60)      | 0.28 (0.18 - 0.42)     | -31.21 | 132.05 (86.06 - 191.96)        | 148.22 (93.01 - 218.22)        | 12.25  |
| <i>Colorado</i>                           | 0.09 (0.06 - 0.13)      | 0.05 (0.03 - 0.08)     | -38.35 | 3.21 (2.06 - 4.73)             | 3.92 (2.48 - 5.76)             | 22.21  |
| <i>Connecticut</i>                        | 0.24 (0.15 - 0.34)      | 0.21 (0.13 - 0.31)     | -12.46 | 9.54 (6.15 - 14.06)            | 10.46 (6.66 - 15.26)           | 9.65   |
| <i>Delaware</i>                           | 0.13 (0.09 - 0.19)      | 0.10 (0.06 - 0.15)     | -23.24 | 1.02 (0.66 - 1.50)             | 1.35 (0.85 - 1.98)             | 31.81  |
| <i>District of Columbia</i>               | 0.37 (0.24 - 0.54)      | 0.44 (0.28 - 0.64)     | 18.35  | 2.82 (1.81 - 4.13)             | 3.67 (2.31 - 5.39)             | 29.97  |
| <i>Florida</i>                            | 0.59 (0.39 - 0.88)      | 0.35 (0.22 - 0.52)     | -40.22 | 100.55 (65.48 - 150.45)        | 104.01 (65.94 - 152.06)        | 3.44   |
| <i>Georgia</i>                            | 0.18 (0.12 - 0.27)      | 0.12 (0.08 - 0.18)     | -35.28 | 12.88 (8.27 - 18.94)           | 16.23 (10.25 - 23.88)          | 26.03  |
| <i>Hawaii</i>                             | 0.03 (0.02 - 0.04)      | 0.02 (0.01 - 0.03)     | -30.87 | 0.33 (0.21 - 0.49)             | 0.37 (0.24 - 0.54)             | 12.22  |
| <i>Idaho</i>                              | 0.06 (0.04 - 0.08)      | 0.04 (0.02 - 0.05)     | -35.91 | 0.62 (0.40 - 0.91)             | 0.78 (0.49 - 1.15)             | 26.36  |
| <i>Illinois</i>                           | 0.07 (0.05 - 0.10)      | 0.07 (0.04 - 0.10)     | -7.69  | 9.56 (6.14 - 14.10)            | 11.49 (7.28 - 16.83)           | 20.20  |
| <i>Indiana</i>                            | 0.04 (0.02 - 0.05)      | 0.03 (0.02 - 0.05)     | -4.90  | 2.28 (1.47 - 3.35)             | 2.94 (1.85 - 4.33)             | 29.00  |
| <i>Iowa</i>                               | 0.03 (0.02 - 0.05)      | 0.04 (0.02 - 0.05)     | 5.47   | 1.15 (0.74 - 1.69)             | 1.48 (0.93 - 2.18)             | 28.82  |
| <i>Kansas</i>                             | 0.04 (0.02 - 0.06)      | 0.04 (0.02 - 0.06)     | -2.53  | 1.13 (0.72 - 1.65)             | 1.45 (0.91 - 2.13)             | 28.45  |
| <i>Kentucky</i>                           | 0.03 (0.02 - 0.04)      | 0.03 (0.02 - 0.04)     | -3.45  | 1.21 (0.78 - 1.77)             | 1.61 (1.01 - 2.38)             | 32.98  |

|                       |                    |                    |        |                         |                        |        |
|-----------------------|--------------------|--------------------|--------|-------------------------|------------------------|--------|
| <i>Louisiana</i>      | 0.10 (0.06 - 0.15) | 0.11 (0.07 - 0.16) | 8.27   | 4.66 (2.97 - 6.82)      | 6.56 (4.11 - 9.69)     | 40.72  |
| <i>Maine</i>          | 0.03 (0.02 - 0.05) | 0.03 (0.02 - 0.05) | 4.49   | 0.46 (0.29 - 0.67)      | 0.61 (0.39 - 0.90)     | 33.82  |
| <i>Maryland</i>       | 0.41 (0.26 - 0.60) | 0.36 (0.23 - 0.54) | -10.31 | 22.07 (14.22 - 32.47)   | 30.00 (18.87 - 44.16)  | 35.97  |
| <i>Massachusetts</i>  | 0.23 (0.15 - 0.34) | 0.22 (0.14 - 0.32) | -6.31  | 16.72 (10.74 - 24.60)   | 19.84 (12.58 - 29.02)  | 18.63  |
| <i>Michigan</i>       | 0.02 (0.02 - 0.04) | 0.03 (0.02 - 0.04) | 1.78   | 2.63 (1.69 - 3.87)      | 3.25 (2.06 - 4.77)     | 23.75  |
| <i>Minnesota</i>      | 0.07 (0.05 - 0.10) | 0.06 (0.04 - 0.09) | -16.30 | 3.60 (2.31 - 5.30)      | 4.44 (2.81 - 6.51)     | 23.22  |
| <i>Mississippi</i>    | 0.02 (0.02 - 0.04) | 0.02 (0.01 - 0.03) | -1.20  | 0.69 (0.44 - 1.01)      | 0.93 (0.58 - 1.37)     | 34.06  |
| <i>Missouri</i>       | 0.04 (0.02 - 0.05) | 0.04 (0.02 - 0.05) | -3.45  | 2.29 (1.47 - 3.36)      | 2.98 (1.88 - 4.39)     | 30.26  |
| <i>Montana</i>        | 0.03 (0.02 - 0.04) | 0.02 (0.01 - 0.03) | -15.66 | 0.24 (0.15 - 0.35)      | 0.30 (0.19 - 0.44)     | 24.69  |
| <i>Nebraska</i>       | 0.06 (0.04 - 0.09) | 0.07 (0.04 - 0.10) | 5.08   | 1.21 (0.77 - 1.77)      | 1.69 (1.06 - 2.48)     | 39.87  |
| <i>Nevada</i>         | 0.50 (0.33 - 0.74) | 0.19 (0.12 - 0.29) | -61.68 | 5.88 (3.79 - 8.63)      | 8.12 (5.11 - 11.94)    | 38.15  |
| <i>New Hampshire</i>  | 0.06 (0.04 - 0.09) | 0.05 (0.03 - 0.07) | -20.84 | 0.73 (0.47 - 1.08)      | 0.86 (0.55 - 1.26)     | 17.08  |
| <i>New Jersey</i>     | 0.43 (0.28 - 0.63) | 0.38 (0.24 - 0.56) | -12.51 | 40.82 (26.30 - 59.84)   | 46.27 (29.48 - 67.58)  | 13.35  |
| <i>New Mexico</i>     | 0.06 (0.04 - 0.08) | 0.04 (0.03 - 0.06) | -28.15 | 0.92 (0.59 - 1.35)      | 1.16 (0.73 - 1.71)     | 27.14  |
| <i>New York</i>       | 0.45 (0.29 - 0.64) | 0.34 (0.21 - 0.50) | -24.15 | 102.27 (66.13 - 147.58) | 91.26 (58.03 - 133.25) | -10.76 |
| <i>North Carolina</i> | 0.14 (0.09 - 0.20) | 0.10 (0.06 - 0.15) | -27.25 | 10.75 (6.90 - 15.78)    | 14.22 (8.94 - 20.95)   | 32.32  |
| <i>North Dakota</i>   | 0.04 (0.03 - 0.06) | 0.04 (0.02 - 0.06) | -3.47  | 0.30 (0.19 - 0.44)      | 0.36 (0.23 - 0.53)     | 21.22  |
| <i>Ohio</i>           | 0.02 (0.01 - 0.03) | 0.02 (0.01 - 0.03) | 2.22   | 2.68 (1.72 - 3.94)      | 3.29 (2.08 - 4.83)     | 22.99  |
| <i>Oklahoma</i>       | 0.04 (0.03 - 0.06) | 0.04 (0.03 - 0.06) | 0.37   | 1.62 (1.04 - 2.37)      | 2.23 (1.40 - 3.28)     | 37.53  |
| <i>Oregon</i>         | 0.05 (0.03 - 0.08) | 0.04 (0.03 - 0.06) | -21.77 | 1.78 (1.15 - 2.62)      | 2.26 (1.43 - 3.33)     | 26.93  |
| <i>Pennsylvania</i>   | 0.05 (0.03 - 0.07) | 0.05 (0.03 - 0.07) | -0.74  | 7.17 (4.60 - 10.58)     | 8.50 (5.39 - 12.43)    | 18.56  |
| <i>Rhode Island</i>   | 0.25 (0.16 - 0.37) | 0.29 (0.18 - 0.42) | 13.16  | 3.08 (1.97 - 4.51)      | 4.12 (2.59 - 6.06)     | 33.71  |
| <i>South Carolina</i> | 0.09 (0.06 - 0.13) | 0.06 (0.04 - 0.09) | -29.10 | 3.39 (2.18 - 5.00)      | 4.15 (2.63 - 6.10)     | 22.52  |
| <i>South Dakota</i>   | 0.05 (0.03 - 0.07) | 0.05 (0.03 - 0.07) | -5.39  | 0.41 (0.27 - 0.61)      | 0.54 (0.34 - 0.80)     | 31.07  |
| <i>Tennessee</i>      | 0.06 (0.04 - 0.09) | 0.06 (0.03 - 0.08) | -13.55 | 3.74 (2.40 - 5.48)      | 4.98 (3.13 - 7.34)     | 33.32  |
| <i>Texas</i>          | 0.26 (0.17 - 0.38) | 0.18 (0.11 - 0.26) | -31.07 | 46.41 (29.79 - 67.88)   | 62.89 (39.59 - 92.22)  | 35.51  |
| <i>Utah</i>           | 0.24 (0.15 - 0.35) | 0.12 (0.08 - 0.18) | -48.43 | 3.67 (2.36 - 5.40)      | 4.29 (2.73 - 6.27)     | 16.84  |
| <i>Vermont</i>        | 0.05 (0.04 - 0.08) | 0.05 (0.03 - 0.08) | -6.92  | 0.35 (0.23 - 0.52)      | 0.44 (0.28 - 0.65)     | 24.53  |
| <i>Virginia</i>       | 0.32 (0.20 - 0.47) | 0.25 (0.16 - 0.37) | -21.73 | 22.22 (14.25 - 32.55)   | 29.04 (18.30 - 42.72)  | 30.70  |
| <i>Washington</i>     | 0.07 (0.05 - 0.10) | 0.05 (0.03 - 0.08) | -27.13 | 3.93 (2.53 - 5.77)      | 5.05 (3.18 - 7.44)     | 28.61  |

|                      |                    |                    |        |                    |                    |       |
|----------------------|--------------------|--------------------|--------|--------------------|--------------------|-------|
| <i>West Virginia</i> | 0.02 (0.01 - 0.02) | 0.02 (0.01 - 0.03) | 10.19  | 0.37 (0.24 - 0.54) | 0.46 (0.29 - 0.68) | 25.95 |
| <i>Wisconsin</i>     | 0.03 (0.02 - 0.04) | 0.02 (0.01 - 0.03) | -12.71 | 1.53 (0.98 - 2.25) | 1.83 (1.16 - 2.68) | 19.93 |
| <i>Wyoming</i>       | 0.05 (0.03 - 0.07) | 0.04 (0.02 - 0.06) | -23.09 | 0.25 (0.16 - 0.37) | 0.31 (0.20 - 0.45) | 24.62 |



## Global, Regional, and National Trends of Chagas Disease from 1990 to 2019

Comprehensive Analysis of the Global Burden of Disease Study

### Background

Chagas Disease (CD) is the parasitic disease with the highest burden and one of the most relevant public health challenges worldwide. However, the information of its burden in non-endemic countries is scarce and heterogeneous.

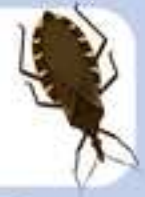

### Objective

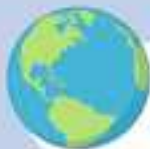

To assess the global prevalence and disability-adjusted life years due to CD using findings from the Global Burden of Disease Study 2019.

### Results

Age-standardized prevalence rate per 100.000 population in 2019  
(% of change 1990-2019)

*Global*

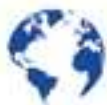

79.86 (-45%) ↓

*Latin America*

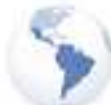

933.76 (-50%) ↓

*North America*

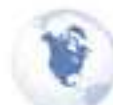

15.55 (-16%) ↓

*Europe*

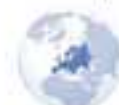

4.12 (111%) ↑

Global age-standardized DALYs rate

3.34 (-61%) ↓

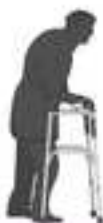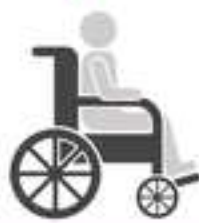

Global Deaths Number

9487 (-16%) ↓

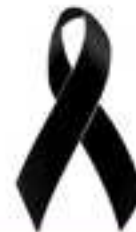

Supplement: gh-17-1-1150-s1.pdf [file gh-17-1-1150-s1.pdf]
